# Supplementary material
Source: PubMed Central journal article supplement (PMC3168948)
Supplement: NIHMS320785-supplement-Supplement1.pdf [file NIHMS320785-supplement-Supplement1.pdf]

## Supplementary Appendix

This appendix has been provided by the authors to give readers additional information about their work.

Supplement to: Rasko DA, Webster DR, Sahl JW, et al. Origins of the *E. coli* strain causing an outbreak of hemolytic-uremic syndrome in Germany. *N Engl J Med* 2011;365:709-17. DOI: 10.1056/NEJMoa1106920.

## Table of Contents

|        |                                    |    |
|--------|------------------------------------|----|
| I.     | Supplementary Methods . . . . .    | 2  |
| II.    | Supplementary References . . . . . | 12 |
| III.   | Supplementary Figure 1 . . . . .   | 14 |
| IV.    | Supplementary Figure 2. . . . .    | 15 |
| V.     | Supplementary Figure 3. . . . .    | 16 |
| VI.    | Supplementary Figure 4. . . . .    | 17 |
| VII.   | Supplementary Figure 5. . . . .    | 18 |
| VIII.  | Supplementary Figure 6. . . . .    | 19 |
| IX.    | Supplementary Figure 7. . . . .    | 20 |
| X.     | Supplementary Figure 8. . . . .    | 21 |
| XI.    | Supplementary Figure 9. . . . .    | 28 |
| XII.   | Supplementary Figure 10. . . . .   | 29 |
| XIII.  | Supplementary Figure 11. . . . .   | 30 |
| XIV.   | Supplementary Table 1. . . . .     | 31 |
| XV.    | Supplementary Table 2. . . . .     | 32 |
| XVI.   | Supplementary Table 3. . . . .     | 33 |
| XVII.  | Supplementary Table 4. . . . .     | 34 |
| XVIII. | Supplementary Table 5. . . . .     | 35 |
| XIX.   | Supplementary Table 6. . . . .     | 36 |
| XX.    | Supplementary Table 7. . . . .     | 38 |
| XXI.   | Supplementary Table 8. . . . .     | 40 |

## Supplementary Methods

### *E. coli* Samples

The outbreak strain sequenced in this study is an O104:H4 serotype (referred to as C227-11 in the main text) isolated from a 64-year-old German woman from the City of Hamburg who was hospitalized in the Department of Gastroenterology at Hvidovre University Hospital, Denmark (2011-05-18). Identification of somatic (O) and flagella (H) antigens was carried out by tube and microtitre-plate agglutination with the specific reference sera O1–O181, supplemented with the presumptive new O groups OX182–OX186, and H1–H56<sup>1</sup>.]] This patient was hospitalized for diarrhea for less than 24 hours and did not develop HUS. Consumption of salad in Hamburg was suspected to be the source of the infection. C227-11 is an isolate of the pathogen collected independently from other outbreak-associated *E. coli* O104:H4 isolates sequenced by other groups: 1) *E. coli* TY-2482 sequenced by BGI (AFOG01000000); 2) *E. coli* LB226692 sequenced by Life Technologies and collaborators at German National Consulting Laboratory for Hemolytic Uremic Syndrome (HUS) at the Institute of Hygiene, University Hospital Muenster (<http://www.ncbi.nlm.nih.gov/nuccore/AFOB00000000>); and 3) *E. coli* H112180280 sequenced by the Health Protection Agency of the UK (<http://www.hpa.org.uk/>).

In addition to the outbreak-associated isolate, we sequenced the genomes of seven *E. coli* O104:H4 isolates from a collection of EAEC strains from Africa and characterized by Statens Serum Institute in Copenhagen (C777-09, C682-09, C35-10, C734-09, C754-09 and C760-09), and four EAEC prototype strains. None of the six recent African isolates had previously been sequenced (see Table 1 in the main text). To examine the distribution of the EAEC isolates relative to EAEC reference isolates, five EAEC prototype strains were included in the genomic comparisons: EAEC strain 042 (O44:H18) was isolated from a child with diarrhea in the course

of an epidemiologic study in Lima, Peru <sup>2</sup>; EAEC strain 17-2 (O3:K-:H2) was isolated from a child with diarrhea in Chile <sup>3</sup>; EAEC strain JM221 (O92:K-:H33) was isolated from an adult with diarrhea in Mexico <sup>4</sup>; EAEC strain C1010-00 (Orough:H-) was isolated from a child with diarrhea in Denmark <sup>5</sup>; and EAEC strain 55989 (O104:H4) was isolated in the course of an etiological study of Human immunodeficiency virus (HIV) and diarrhea in adults in Bangui, Central African Republic <sup>6</sup>. Two of these strains, 55989 <sup>7</sup> and O42 <sup>8</sup> had whole genome sequencing data available prior to our study.

#### *DNA extraction and preparation*

For isolate C227-11, we isolated DNA using a Qiagen DNEasy Blood and Tissue Kit per manufacturer instructions. The isolate was grown overnight in standard LB broth and the extraction was performed according to the kit instructions using 1 ml overnight culture per reaction and treating with proteinase K for 2 hours. The DNA was eluted in 100 ul AE buffer per column.

For the seven non-outbreak O104:H4 strains from Africa and four reference isolates, we grew bacterial cultures overnight from a population in 50 ml of Luria broth, minimizing the number of passages of each strain. Genomic DNA was isolated according to standard methods<sup>9</sup>. Briefly, bacterial cells were concentrated by centrifugation, washed and suspended in isolation buffer (0.15 M Tris, 0.1 M EDTA, pH 8.0). Sodium dodecyl sulfate was then added to 1% (vol/vol) final concentration and allowed to incubate for 1 hour at 55°C or until the solution cleared. Two volumes of phenol:chloroform:isoamylalcohol (25:24:1) were added and briefly mixed by vortex. The resulting solution was separated by centrifugation at 12,000xg for 15 minutes at 4°C. The aqueous layer (top) was removed to a new tube and mixed with two volumes

of chloroform. The mixture was separated by centrifugation at 12,000xg for 15 minutes at 4°C and the aqueous layer (top) was moved to a clean tube. The aqueous layer was then extracted with at least 10 volumes of ice-cold ethanol and the precipitated DNA was spooled out of the mixture and suspended in ultrapure water. The purified mixture was further digested with RNase at 37°C and re-precipitated with 0.1 volumes of 3M NaOAc and 10 volumes of ice-cold ethanol. The pellet was allowed to air dry and then dissolved in a minimal volume of nuclease-free water (Ambion). The quantity and quality of genomic DNA was verified by gel electrophoresis, spectroscopy and picogreen assay.

### *DNA Sequencing*

For all samples, genomic DNA was sheared to a target size 8-10 kb using a Hydroshear Plus Shearing system (Digilab). The outbreak strain C227-11 was also sheared to target size 700bp using a Covaris S200 sonicator (Covaris). Sheared samples were purified, size-selected, and concentrated using Ampure XP Solid Phase Reversible Immobilization (Beckman Coulter) at 0.45-fold volume (8-10Kb) or 0.7-fold volume (700bp)<sup>10</sup>. SMRTBell libraries were constructed with Pacific Biosciences' commercial Template Prep Kit and accompanying protocols<sup>11</sup>. SMRTbell templates were complexed to polymerase molecules using 6nM of the respective SMRTbell library and 3X excess DNA polymerase at a concentration of 18nM as previously described<sup>10,12</sup>.

Large insert (8K-10K) SMRTbell libraries were immobilized at 500 pM for 30 minutes on nanofabricated chips containing an array of sequencing zero-mode waveguides (ZMWs). Smaller insert, 700bp SMRTbell complexes were immobilized at 100-200 pM concentration. Standard sequencing was conducted on a PacBio-RS Sequencer using 75 or 90

minute continuous collection times<sup>10,12</sup>. The 75-90 minute sequencing period enabled the collection of sequences as long as 15,000bp, where 8kb SMRTbells generated long sub-read length sequences (Supplementary Table 1) and 90 minute collection spans using 700bp SMRTbells provided enough SMRTbell passes for higher accuracy CCS sequencing.

### *De novo genome assembly of SMRT sequencing data*

The *de novo* assembly algorithm applied to the SMRT sequencing data generated on the C227-11 isolate incorporates elements of the AMOS assembly software package<sup>13</sup> and employs several novel algorithms tailored to Pacific Biosciences' continuous long read (CLR) and circular consensus sequencing (CCS) read data. Supplementary figure 1 provides a high-level overview of the assembly pipeline. In the first phase, PacBio CCS data were aligned to CLR data using BLASR (<http://www.pacbiodevnet.com/>) to allow error correction. Error-corrected sequence for each long-read was derived by performing a multiple-sequence alignment of CCS reads followed by plurality consensus base-calling using the AMOS algorithm make-consensus. The CLR data was split at any point without CCS coverage.

The error corrected CLR data were then fed directly into the Pacific Biosciences assembler ALLORA (<http://www.pacbiodevnet.com/>) (for A Long Read Assembler). ALLORA uses a traditional overlap-layout-consensus approach. Pairwise overlap alignments were detected using BLASR and analyzed to identify maximally contiguous sequences (contigs) using the AMOS algorithm tigger. Consensus sequence for each contig was again derived using the AMOS algorithm make-consensus. As a final step, minimus2 was run on the resultant contigs to merge any remaining overlaps between contigs. The final contigs were used as a reference to the

resequencing pipeline, and the entirety of CCS data was aligned against them in order to provide the final consensus sequence.

### *Resequencing analysis*

The complete genome sequences for isolates TY-2482 and 55989 were used as reference genomes for mapping all sequencing reads generated on the 12 strains and isolates indicated above. Mapping was carried out using the FASTA sequences found at [http://climb.genomics.cn/Ecoli\\_TY-2482](http://climb.genomics.cn/Ecoli_TY-2482) (doi:10.5524/100001 for TY-2482) and NCBI accession numbers NC\_011748 (for 55989). The re-sequencing analysis pipeline consisted of filtering, reference alignment, and consensus calling steps. Reads were filtered by requiring that each raw read had a raw read length > 100bp and an estimated accuracy of at least 75%. This reduced the number of reads from non-sequencing zero-mode waveguides while removing few true sequencing reads since the raw readlength averaged ~2000bp in these data. Reads were aligned to the TY-2482 and 55989 references using a computational variant of the Smith-Waterman algorithm, which finds chains of exact sequence hits in the reference sequence and refines these chains into Smith-Waterman local alignments. A multiple sequence alignment (MSA) was constructed by using the reference-guided pairwise alignments. Consensus sequences were called for each isolate using a majority-rule plurality algorithm.

Supplementary Table 1 summarizes the raw statistics of the sequencing reads. The single pass mean accuracy achieved over all samples for the CLR data was 84.4%. However, the accuracy distribution is asymmetric (Supplementary Figure 2), with a heavy left tail that is longer than realized previously<sup>10</sup>, due to the fact that very long reads (CLR data) can be mapped with extremely high precision even at low accuracy. Therefore, one consequence of longer reads

is a reduced mean-level accuracy given long, low accuracy reads map perfectly and aid in scaffolding higher accuracy short reads for de novo assembly (so filtering out such reads would result in less coverage and, as a result, a less robust de novo assembly). Given the heavy tail on the left hand side of this distribution, a more accurate representation of the accuracy distribution is the mode (Supplementary Table 1; Supplementary Figure 11), which on average for the CLR data was 88.2%. The circular consensus sequence accuracy for the CCS data generated on isolate C227-11 for de novo assembly had a mean level accuracy of 97.8%, but an accuracy characterized by the mode of this distribution of 99.9%. The combination of highly accurate CCS data combined with the very long CLR read data resulted in a high-quality assembly of the C227-11 genome comprised of 37 contigs covering the chromosome, with 30 of the largest contigs covering 99% of the genome and all 37 contigs combined covering 99.7% of the genome (Supplementary Table 3).

To investigate the effect of the filtering step on the data, we also aligned reads to the reference without imposing any pre-alignment filtering. Only significant hits were kept to the reference as measured by comparison to a random alignment model. Under these conditions, average read length of the underlying sequence was 2,110bp and the sequenced depth of coverage was increased by 44-66%, without an appreciable distortion in the coverage uniformity, demonstrating that the filtering process was unlikely to introduce errors into downstream sequence analyses. These results suggest that for the purposes of coverage analysis, we should be able to derive more power from the same input data by allowing more reads through the early analysis stages and applying significance tests after reference alignment.

### *Sequence Coverage Analysis*



The depth of coverage across the TY-2482 and 55989 genome sequences were plotted for each of the O104 isolates we sequenced. For Figure 1 in the main text, the coverage variation was estimated using a breakpoint analysis, given breakpoints are easy to detect with the CLR data. For each position the mean of the minimum of the left and right fragment lengths for a mapped read is computed. If there is no breakpoint this estimate will on average be equal to one half the mean mapped subread length at that position. If a breakpoint exists at a given position, this mean fragment length estimate will be significantly smaller than the expected mean mapped subread length. Colors were assigned across the continuum of possible coverage estimates, with estimates close to the expected average taking on cooler colors (blue) and those taking on values significantly less than the expected average taking on hotter colors (red). The mean values and corresponding standard deviations of the minimum of the left and right fragment lengths were  $752 \pm 103$  bp,  $804 \pm 264$  bp,  $873 \pm 222$  bp,  $728 \pm 199$  bp,  $767 \pm 207$  bp,  $767 \pm 265$  bp,  $773 \pm 307$  bp and  $730 \pm 355$  bp for strains 55989, C227-11, C734-09, C35-10, C682-09, C760-09, and C754-09, and C777-09 respectively.

#### *Genome annotation of C227-11*

Assembly contigs for C227-11 were analyzed using a previously described frameshift prediction procedure<sup>14</sup>. This procedure locates apparent frameshifts in gene coding regions by incorporating them into a hidden Markov model (HMM) trained on the prokaryotic gene coding model. Frameshifts in sequenced DNA can be indicative of uncorrected indel sequencing errors, and their presence pinpoints areas in which polishing of the DNA sequence is required, given uncorrected errors of this type can result in interrupted gene models and so are disruptive to downstream analyses. In addition, given a significant indel rate in the final assembly

(Supplementary Table 2), we carried out an extra step of verifying apparent frameshifts against the Pfam protein database. Regions containing such verified apparent frameshifts were interrogated for presence of indel sequencing errors, and automatic error correction was performed where errors were confirmed. Of 285 regions with verified apparent frameshifts, 175 were successfully corrected using this scheme. These changes are not included when computing the identity/accuracy of the *de novo* C227-11 assembly as reported in the main text and Supplementary Table 3.

After polishing the genome sequence for C227-11, automated genome annotation was carried out using a previously described computational genomics pipeline<sup>15</sup>. In this pipeline, genes are predicted using a combination of the Glimmer and GeneMarkS *de novo* gene predictors, and BLASTP alignment against the nonredundant nucleotide database (nt). Annotation was performed using the InterProScan family of programs, the SignalP algorithm and comparison against the VFDB virulence factor database. The resulting annotation, formatted according to standard terminology, was submitted to GenBank with the genome sequence under GenBank accession number AFST00000000.

#### *Comparison of genome assemblies for German outbreak isolates*

Supplemental Table 2 and Supplementary Figure 3 summarize a comparison of each of the publicly available datasets to the completed TY-2482 reference. The Mummer package<sup>16</sup> was used to align the genomes, carry out SNP calling, and as a basis for computing reference coverage and identity for each of the assemblies. Parameters optimized for SNP-calling were used (nucmer with the “-maxmatch” parameter, delta-filter with the “-1” parameter, and show-snps with the “-Clr” parameters). Specifically, these parameters require 1-1 alignment of query

and reference intervals, but allow query sequences to be rearranged in order to fit the reference; they also minimize repeat mappings when calling variants.

The single nucleotide differences identified between the TY-2482 and C227-11 assemblies may reflect actual sequence differences between the isolates or sequencing errors specific to either of the sequences. The PCR amplification required for sequencing the TY-2482 genome by Illumina's HiSeq 2000 instrument and Life Technology's Personal Genome Machine instrument, can introduce errors in the template sequence as well as amplification bias, which in turn can lead to systematic errors in the final assemblies<sup>17-19</sup>. On the other hand, the sequencing of C227-11 using the PacBio RS did not require PCR amplification as a step in the sequencing process, so that when combined with the uniform nature of errors on the PacBio RS platform (lack of systematic bias), it is not unreasonable to expect that the consensus accuracy could be higher even despite a high single pass sequencing error rate<sup>11</sup>. By combining these data generated from different platforms we have reduced the overall rate of error in our finished genome sequence for C227-11 (last row of Supplementary Table 2).

A small number of larger scale structural rearrangements were also observed between C227-11 and TY-2482 (Supplementary Figure 5). Distinguishing misassemblies from true variation is often challenging. To validate large rearrangements two methods were taken: 1) comparison to other strains (notably H1121), and 2) remapping of long read data to examine if the alternative (TY-2482) could be accepted. Supplementary Figure 5 shows two examples of larger events shared between C227-11 and H1121. Long-read data was remapped to the TY-2482 reference versus the H1121/C227-11 assemblies, showing strong support of the H1121/C227-11 preferentially over the TY-2482 assemblies in this region.

### *Whole genome phylogenetic analysis*

The sequence data for 40 *E. coli/Shigella* genomes (Supplementary Table 3) was downloaded from GenBank and combined with sequence data from the 12 EAEC isolates. Sequences were aligned with Mugsy<sup>20</sup>, which incorporates MUMmer<sup>21,22</sup> and SeqAn<sup>23</sup> to generate blocks of conserved, aligned sequence between species in the MAF file format. Blocks were then joined together and converted to a multifasta file with the bx-python toolkit

([http://bitbucket.org/james\\_taylor/bx-python/wiki/Home](http://bitbucket.org/james_taylor/bx-python/wiki/Home)). Columns with gaps in any one genome were removed with Gblocks<sup>24</sup> to create the core alignment, which consists of ~2.56 Mb of genomic sequence. As a result of this process, the indels highlighted in Supplementary Table 2 and Supplementary Figure 3 were not considered in the phylogenetic analysis. A phylogenetic tree was inferred by RAxML<sup>25</sup> with one hundred bootstrap replicates and a general time-reversible model. Additionally, a subtree containing only EAEC isolates were compared in the same manner.

### *Quantitative Reverse Transcriptase Polymerase Chain Reaction (qRT-PCR) to examine the induction of the Shiga-toxin genes by ciprofloxacin.*

An overnight culture of *E. coli* strain C227-11 was diluted in Lauria broth to an OD<sub>600</sub> nm of 0.09 and divided into six separate cultures of equal volume. Ciprofloxacin at a final concentration of 25 ng/mL was added to three of the cultures. The C227-11 cultures were incubated at 37°C for 6 hrs. and RNA was extracted using the Ambion RiboPure-Bacteria Kit, DNaseI treatment (Ambion). The resulting RNA was assayed using qRT-PCR with technical duplicates of the triplicate biological samples. The primers for the *stx2b* and *rpoA* genes were previously described by Zhang et al<sup>26</sup> and Rasko et al<sup>27</sup>, respectively. The qRT-PCR was

performed and analyzed as previously described in Rasko et al. <sup>27</sup> and reported as fold change as fold change of the *stx2b* gene, using the *rpoA* gene as a control.

#### *Identification of E. coli virulence factors*

Sequences were obtained from GenBank for known and characterized *E. coli* virulence factors from the EAEC, EPEC and EHEC pathovars. A list of the examined genes can be found in Supplementary Table 4.

#### *Nucleotide sequence accession numbers*

The genomic data for these isolates has been submitted to GenBank under accession number AFST00000000 (C227-11) and to the NCBI Sequence Read Archive under study number SRA038239.1 (all strains).

#### **Supplementary References**

1. Orskov F, Orskov I. Escherichia coli serotyping and disease in man and animals. Can J Microbiol 1992;38:699-704.
2. Nataro JP, Baldini MM, Kaper JB, Black RE, Bravo N, Levine MM. Detection of an adherence factor of enteropathogenic Escherichia coli with a DNA probe. J Infect Dis 1985;152:560-5.
3. Vial PA, Robins-Browne R, Lior H, et al. Characterization of enteroadherent-aggregative Escherichia coli, a putative agent of diarrheal disease. J Infect Dis 1988;158:70-9.
4. Mathewson JJ, Oberhelman RA, Dupont HL, Javier de la Cabada F, Garibay EV. Enteroadherent Escherichia coli as a cause of diarrhea among children in Mexico. J Clin Microbiol 1987;25:1917-9.
5. Olesen B, Neimann J, Bottiger B, et al. Etiology of diarrhea in young children in Denmark: a case-control study. J Clin Microbiol 2005;43:3636-41.
6. Germani Y, Minssart P, Vohito M, et al. Etiologies of acute, persistent, and dysenteric diarrheas in adults in Bangui, Central African Republic, in relation to human immunodeficiency virus serostatus. Am J Trop Med Hyg 1998;59:1008-14.

7. Touchon M, Hoede C, Tenaillon O, et al. Organised genome dynamics in the *Escherichia coli* species results in highly diverse adaptive paths. *PLoS Genet* 2009;5:e1000344.
8. Chaudhuri RR, Sebahia M, Hobman JL, et al. Complete genome sequence and comparative metabolic profiling of the prototypical enteroaggregative *Escherichia coli* strain 042. *PLoS One* 2010;5:e8801.
9. Ge Z, Taylor DE. *H. pylori* DNA transformation by natural competence and electroporation. In: Clayton CL, Mobley HLT, eds. *Helicobacter pylori* Protocols. Totowa: Humana Press Inc.; 1992:145-52.
10. Chin CS, Sorenson J, Harris JB, et al. The origin of the Haitian cholera outbreak strain. *N Engl J Med* 2011;364:33-42.
11. Travers KJ, Chin CS, Rank DR, Eid JS, Turner SW. A flexible and efficient template format for circular consensus sequencing and SNP detection. *Nucleic Acids Res*;38:e159.
12. Korlach J, Bjornson KP, Chaudhuri BP, et al. Real-time DNA sequencing from single polymerase molecules. *Methods Enzymol* 2010;472:431-55.
13. Pop M, Phillippy A, Delcher AL, Salzberg SL. Comparative genome assembly. *Brief Bioinform* 2004;5:237-48.
14. Antonov I, Borodovsky M. Genetack: frameshift identification in protein-coding sequences by the Viterbi algorithm. *J Bioinform Comput Biol* 2010;8:535-51.
15. Kislyuk AO, Katz LS, Agrawal S, et al. A computational genomics pipeline for prokaryotic sequencing projects. *Bioinformatics* 2010;26:1819-26.
16. Kurtz S, Phillippy A, Delcher AL, et al. Versatile and open software for comparing large genomes. *Genome Biol* 2004;5:R12.
17. Metzker ML. Sequencing technologies - the next generation. *Nat Rev Genet* 2010;11:31-46.
18. Schatz MC, Delcher AL, Salzberg SL. Assembly of large genomes using second-generation sequencing. *Genome Res* 2010;20:1165-73.
19. Whiteford N, Skelly T, Curtis C, et al. Swift: primary data analysis for the Illumina Solexa sequencing platform. *Bioinformatics* 2009;25:2194-9.
20. Angiuoli SV, Salzberg SL. Mugsy: fast multiple alignment of closely related whole genomes. *Bioinformatics* 2011;27:334-42.
21. Delcher AL, Phillippy A, Carlton J, Salzberg SL. Fast algorithms for large-scale genome alignment and comparison. *Nucleic Acids Res* 2002;30:2478-83.
22. Delcher AL, Salzberg SL, Phillippy AM. Using MUMmer to identify similar regions in large sequence sets. *Curr Protoc Bioinformatics* 2003;Chapter 10:Unit 10 3.
23. Doring A, Weese D, Rausch T, Reinert K. SeqAn an efficient, generic C++ library for sequence analysis. *BMC Bioinformatics* 2008;9:11.
24. Talavera G, Castresana J. Improvement of phylogenies after removing divergent and ambiguously aligned blocks from protein sequence alignments. *Syst Biol* 2007;56:564-77.
25. Stamatakis A. RAxML-VI-HPC: maximum likelihood-based phylogenetic analyses with thousands of taxa and mixed models. *Bioinformatics* 2006;22:2688-90.
26. Zhang Y, Laing C, Zhang Z, et al. Lineage and host source are both correlated with levels of Shiga toxin 2 production by *Escherichia coli* O157:H7 strains. *Appl Environ Microbiol* 2010;76:474-82.
27. Rasko DA, Moreira CG, Li de R, et al. Targeting QseC signaling and virulence for antibiotic development. *Science* 2008;321:1078-80.

## Supplementary Figures

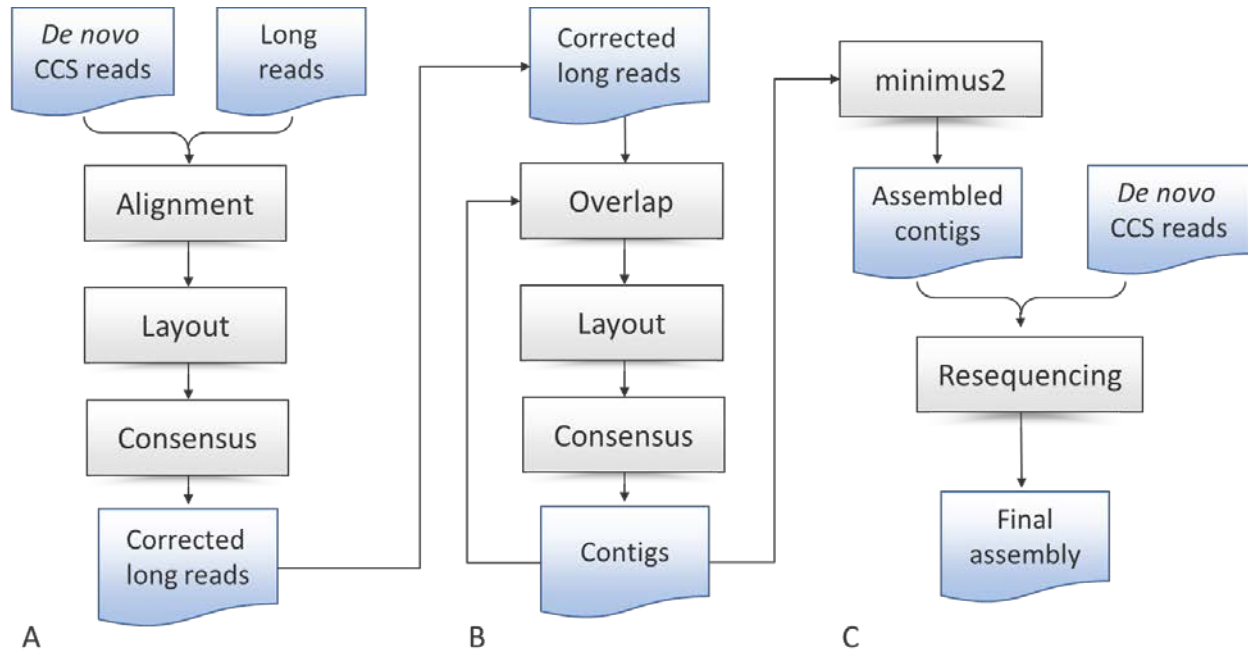

**Supplementary Figure 1.** *De novo* assembly pipeline for SMRT sequencing data. **A)** The first step of the assembly process uses highly accurate CCS reads to correct errors in the single-pass long sequence reads. **B)** The corrected long reads are then provided as input to ALLORA, an iterative overlap-layout-consensus *de novo* assembly algorithm. **C)** The resulting assembled contigs are then polished with the resequencing pipeline and the original CCS reads, producing the final, high-accuracy assembly.

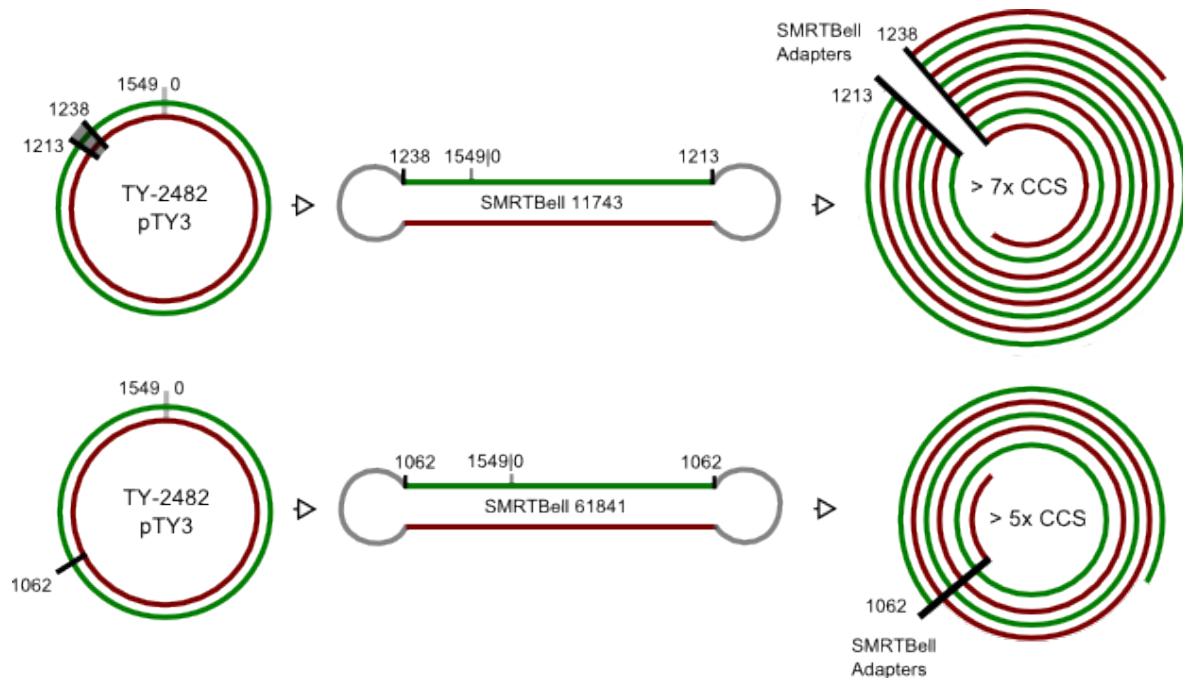

**Supplementary Figure 2.** Single reads spanning a small plasmid. During the automated assembly process of strain C227-11 a small contig was detected with strong homology to the pTY3 plasmid from the TY-2482 assembly. Further analysis revealed the presence of a number of long reads clearly representing SMRTBell structures containing the majority of the pTY3 sequence. The location of apparent break points within the plasmid varied, suggesting that multiple plasmid sequences were linearized during sample preparation and subsequently ligated to adapter sequences to form SMRTBells. In some cases small portions of the plasmid surrounding the break point were absent from the SMRTBell, possibly due to degradation of the linearized plasmid before ligation. For two reads selected from Supplementary Table 2 a likely model for conversion of the plasmid into a SMRTBell and the resulting sequence read are shown. Shaded regions within the plasmid diagrams for pTY3 depict the region of the plasmid not present in the corresponding read. Single reads (far right) are represented in a circular form with adapters removed for clarity. All coordinates are relative to the TY-2482 pTY3 sequence. Green and red lines indicate forward and reverse orientation.



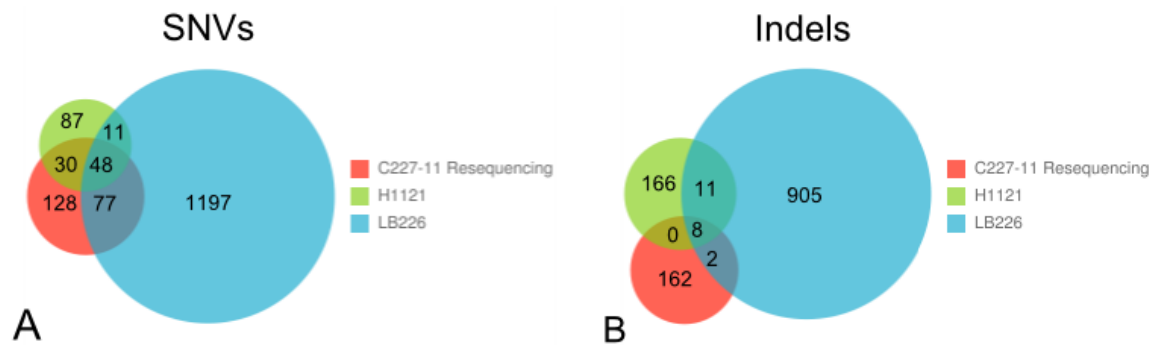

**Supplementary Figure 3.** Venn Diagram of single nucleotide variation calls relative to the TY-2482 chromosome. The sum of the counts in each colored circle represents the number of single nucleotide variations (Panel A) and single nucleotide insertions or deletions (indels; Panel B) detected between the indicated isolate and TY-2482 (Supplementary Table 3). The sizes of the circles are proportional to the number of variants detected. The counts in the overlap regions indicate whether SNVs or Indels were shared between the indicated isolates. C227-11 variant calls were made using EviCons, accepting calls with consensus confidence scores greater than 1 (EviCons consensus confidences range from 0 to 10). Allowing variant calls with lower confidence increases the number of predicted SNVs to 284 and indels to 882.



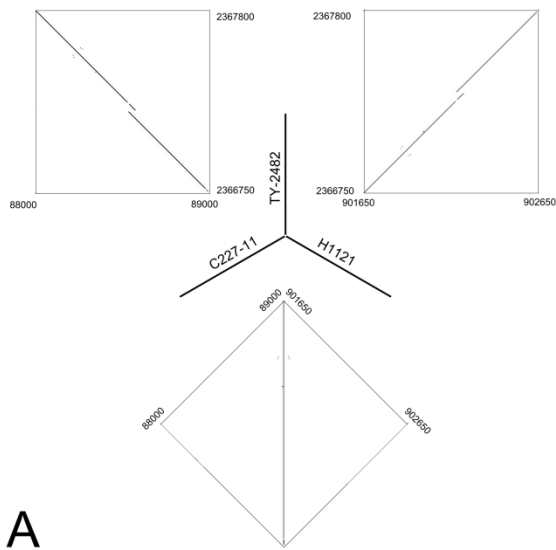

**A**

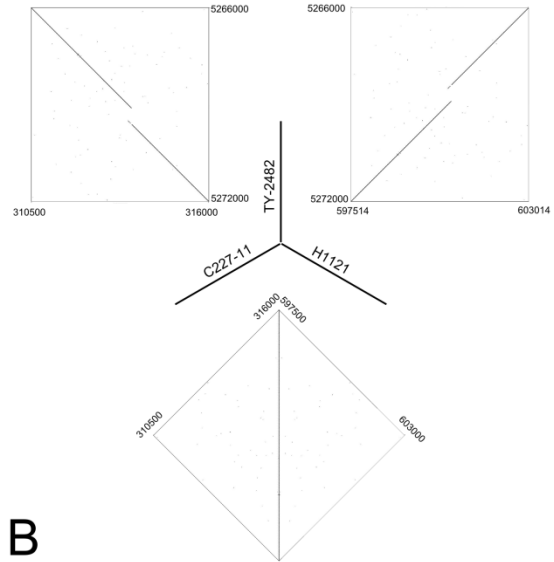

**B**

**Supplementary Figure 5.** Comparison of Large Structural Differences between C227-11, H1121 and TY-2482. In each plot three axes represents regions from TY-2482, C227-11 and H1121. For each pair of axes a dot plot for the corresponding strain pair is plotted. If the genomic regions are identical between the strains, the dot plot gives rise to a continuous diagonal line. If there are large-scale structural variations between the strains, the dot plot will give rise to lines that are disconnected. **A)** The break in the diagonal lines in the comparisons to the TY-2482 chromosome represent a compression of a tandem duplication in C227-11 and H1121 relative to TY-2482. **B)** The break in the diagonal lines in the comparisons to the TY-2482 chromosome represent a deletion in C227-11 and H1121 relative to TY-2482.

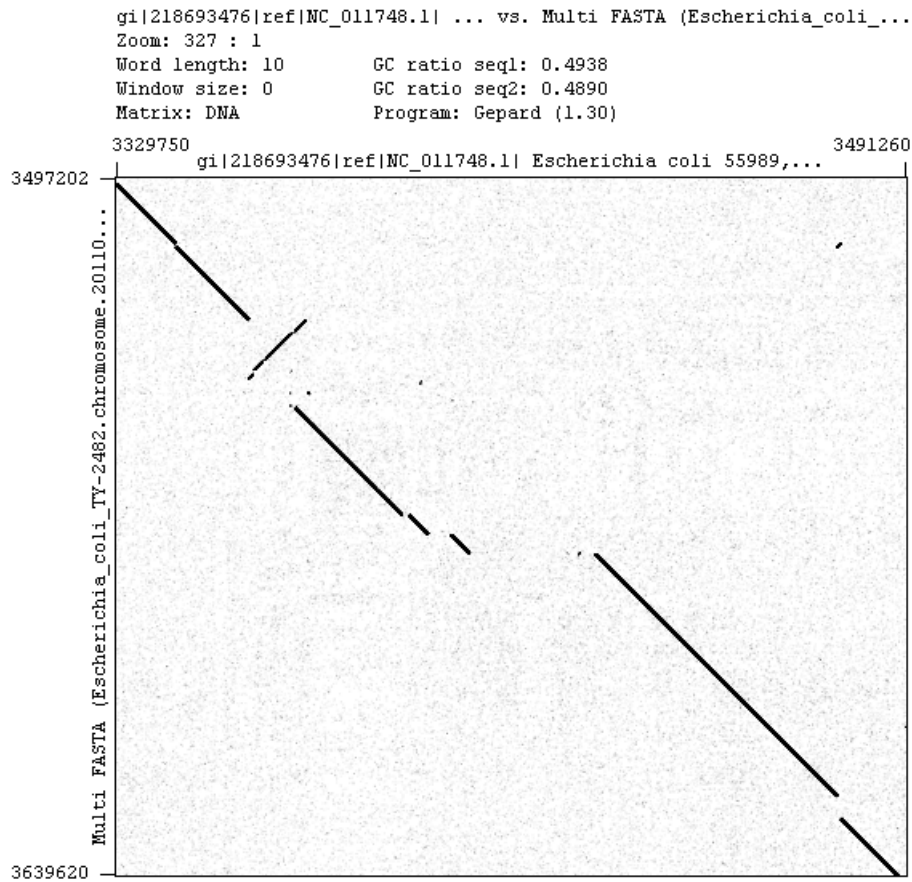

**Supplementary Figure 6.** Dot plot of the region with significant structural variation between TY-2482 and the 55989 reference EAEC strain. This region corresponds to the green shaded regions highlighted in the chromosome coverage plot in Figure 1 of the main text. This region harbors a number of virulence factors like *pic* and the *aai* pathogenicity island. While these virulence factors are present in both TY-2482 and 55989, there is significant structural variation between these two strains in this region, as depicted in this plot.

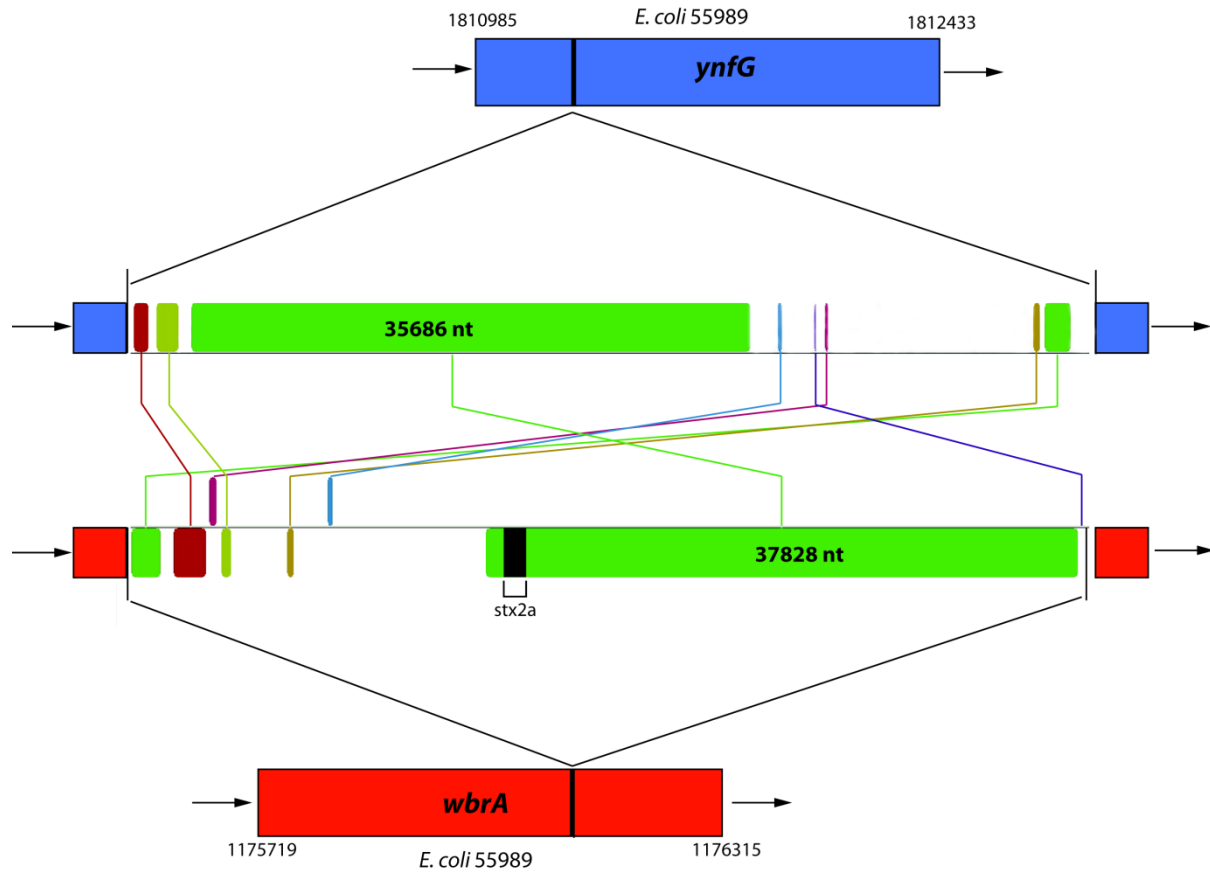

**Supplementary Figure 7.** Similarity between regions of the two lambdoid phages in C227-11. The two phages are present at distinct genomic locations shown with reference to the *E. coli* 55989 genome at the top and bottom of the figure. Although large portions of the phage genomes are homologous, some portions are quite distinct, as demonstrated by the Mauve alignment. Importantly, only the phage inserted into the *wbrA* gene contains the *stx2* genes.

STX2\_PHI\_272\_PHAGE\_HQ424691  
Stx2\_converting\_phase\_AP005154  
Stx2\_phase\_Min27\_EU311208  
Stx2\_Sakai\_BA000007  
Stx2\_933W\_AP004402  
STX2\_C227-11

```
GTGTTCTTATGGTTACATCGCGGATGGGTAAGATACTGATGCGTGATATCCGGCAGGTTCTTGAGTCTGGGGGCATGGGCGGCAAATAACCATGAGG
GTGTTCTTATGGTTACACGCGGATGGGTAAGATACTGATGCGTGATATCCGGCAGGTTCTTGAGCCTGGGGGCATGGGCGGCAAATAACCATGAGG
GTGTTCTTATGGTTACACGCGGATGGGTAAGATACTGATGCGTGATATCCGGCAGGTTCTTGAGCCTGGGGGCATGGGCGGCAAATAACCATGAGG
GTGTTCTTATGGTTACACGCGGATGGGTAAGATACTGATGCGTGATATCCGGCAGGTTCTTGAGCCTGGGGGCATGGGCGGCAAATAACCATGAGG
GTGTTCTTATGGTTACACGCGGATGGGTAAGATACTGATGCGTGATATCCGGCAGGTTCTTGAGCCTGGGGGCATGGGCGGCAAATAACCATGAGG
GTGTTCTTATGGTTACACGCGGATGGGTAAGATACTGATGCGTGATATCCGGCAGGTTCTTGAGCCTGGGGGCATGGGCGGCAAATAACCATGAGG
*****
```

Stx2\_phi\_272\_phase\_HQ424691  
Stx2\_converting\_phase\_AP005154  
Stx2\_phase\_Min27\_EU311208  
Stx2\_Sakai\_BA000007  
Stx2\_933W\_AP004402  
Stx2\_C227-11

```
ATGTGACCTGGTACCACATGCGCCGATTTAAGGACTGATCCCCGAAAAGTAAATCACGCCGAGTCTGTGACGATGATGCGATGGTATGATG
ATGTTACATGGTCCGCCATTTGCTGCCGATTTAAGGACTGATCCCCGAAAAGTAAATCACGCCGAGTCTGTGACGATGATGCGATGGTATGATG
ATGTTACATGGTCCGCCATTTGCTGCCGATTTAAGGACTGATCCCCGAAAAGTAAATCACGCCGAGTCTGTGACGATGATGCGATGGTATGATG
ATGTTACATGGTCCGCCATTTGCTGCCGATTTAAGGACTGATCCCCGAAAAGTAAATCACGCCGAGTCTGTGACGATGATGCGATGGTATGATG
ATGTTACATGGTCCGCCATTTGCTGCCGATTTAAGGACTGATCCCCGAAAAGTAAATCACGCCGAGTCTGTGACGATGATGCGATGGTATGATG
ATGTTACATGGTCCGCCATTTGCTGCCGATTTAAGGACTGATCCCCGAAAAGTAAATCACGCCGAGTCTGTGACGATGATGCGATGGTATGATG
****
```

STX2\_PHI\_272\_PHAGE\_HQ424691  
Stx2\_converting\_phase\_AP005154  
Stx2\_phase\_Min27\_EU311208  
Stx2\_Sakai\_BA000007  
Stx2\_933W\_AP004402  
STX2\_C227-11

```
CGGGTGTATAGCCCGCTTTACCGGAAACAATCGCCATCTGCATGACTTGCATGGTCTCTGACACCTGTATAGTAAACGCCTTCACAAAGCGGAGGG
CGGGTGCATAGCCCGCTTTACCGGAAACAATCGCCATCTGCATGACTTGCATGGTCTCTGACACCTGTATAGTAAACGCCTTCACAAAGCGGAGGG
CGGGTGCATAGCCCGCTTTACCGGAAACAATCGCCATCTGCATGACTTGCATGGTCTCTGACACCTGTATAGTAAACGCCTTCACAAAGCGGAGGG
CGGGTGCATAGCCCGCTTTACCGGAAACAATCGCCATCTGCATGACTTGCATGGTCTCTGACACCTGTATAGTAAACGCCTTCACAAAGCGGAGGG
CGGGTGCATAGCCCGCTTTACCGGAAACAATCGCCATCTGCATGACTTGCATGGTCTCTGACACCTGTATAGTAAACGCCTTCACAAAGCGGAGGG
CGGGTGCATAGCCCGCTTTACCGGAAACAATCGCCATCTGCATGACTTGCATGGTCTCTGACACCTGTATAGTAAACGCCTTCACAAAGCGGAGGG
*****
```

antitermination  
protein Q

STX2\_PHI\_272\_PHAGE\_HQ424691  
Stx2\_converting\_phase\_AP005154  
Stx2\_phase\_Min27\_EU311208  
Stx2\_Sakai\_BA000007  
Stx2\_933W\_AP004402  
STX2\_C227-11

```
GATTGTTGAAGGCATGCTGATGATGCTGGGAGTGAAGCTTGAGATGGATCGGTATGTTGAGCGTGAATGCGCGGAGGGAGAACCTCTGTATTTATCAG
GATTGTTGAAGGCATGCTGATGATGCTGGGAGTGAAGCTTGAGATGGATCGGTATGTTGAGCGTGAATGCGCGGAGGGAGAACCTCTGTATTTATCAG
GATTGTTGAAGGCATGCTGATGATGCTGGGAGTGAAGCTTGAGATGGATCGGTATGTTGAGCGTGAATGCGCGGAGGGAGAACCTCTGTATTTATCAG
GATTGTTGAAGGCATGCTGATGATGCTGGGAGTGAAGCTTGAGATGGATCGGTATGTTGAGCGTGAATGCGCGGAGGGAGAACCTCTGTATTTATCAG
GATTGTTGAAGGCATGCTGATGATGCTGGGAGTGAAGCTTGAGATGGATCGGTATGTTGAGCGTGAATGCGCGGAGGGAGAACCTCTGTATTTATCAG
GATTGTTGAAGGCATGCTGATGATGCTGGGAGTGAAGCTTGAGATGGATCGGTATGTTGAGCGTGAATGCGCGGAGGGAGAACCTCTGTATTTATCAG
*****
```

STX2\_PHI\_272\_PHAGE\_HQ424691  
Stx2\_converting\_phase\_AP005154  
Stx2\_phase\_Min27\_EU311208  
Stx2\_Sakai\_BA000007  
Stx2\_933W\_AP004402  
STX2\_C227-11

```
CGAAAAAATAGTTTACGATCGTAAAAATCTGCATATCATATAAAGAGTGGTTACATTGCCACGCTGCTTATTAACCCCGATGCGCGGGTTTTTTTGTGTA
CGAAAAAATAGTTTACGATCGTAAAAATCTGCATATCATATAAAGAGTGGTTACATTGCCACGCTGCTTATTAACCCCGATGCGCGGGTTTTTTTGTGTA
CGAAAAAATAGTTTACGATCGTAAAAATCTGCATATCATATAAAGAGTGGTTACATTGCCACGCTGCTTATTAACCCCGATGCGCGGGTTTTTTTGTGTA
CGAAAAAATAGTTTACGATCGTAAAAATCTGCATATCATATAAAGAGTGGTTACATTGCCACGCTGCTTATTAACCCCGATGCGCGGGTTTTTTTGTGTA
CGAAAAAATAGTTTACGATCGTAAAAATCTGCATATCATATAAAGAGTGGTTACATTGCCACGCTGCTTATTAACCCCGATGCGCGGGTTTTTTTGTGTA
CGAAAAAATAGTTTACGATCGTAAAAATCTGCATATCATATAAAGAGTGGTTACATTGCCACGCTGCTTATTAACCCCGATGCGCGGGTTTTTTTGTGTA
*****
```

pR'; putative late promoter

STX2\_PHI\_272\_PHAGE\_HQ424691  
Stx2\_converting\_phase\_AP005154  
Stx2\_phase\_Min27\_EU311208  
Stx2\_Sakai\_BA000007  
Stx2\_933W\_AP004402  
STX2\_C227-11

```
CCCGAATCCTGTGAGCTATACCGAAAGTACACAGAAGGAAGGTGCGACCAATAATAACAAAACTTAAAAATGCACATGGCACTATTAGTTTTTC
CCCGAATCCTGTGAGCTATACCGAAAGTACACAGAAGGAAGGTGCGACCAATAATAACAAAACTTAAAAATGCACATAGCACTATTAGTTTTTC
CCCGAATCCTGTGAGCTATACCGAAAGTACACAGAAGGAAGGTGCGACCAATAATAACAAAACTTAAAAATGCACATAGCACTATTAGTTTTTC
CCCGAATCCTGTGAGCTATACCGAAAGTACACAGAAGGAAGGTGCGACCAATAATAACAAAACTTAAAAATGCACATAGCACTATTAGTTTTTC
CCCGAATCCTGTGAGCTATACCGAAAGTACACAGAAGGAAGGTGCGACCAATAATAACAAAACTTAAAAATGCACATAGCACTATTAGTTTTTC
CCCGAATCCTGTGAGCTATACCGAAAGTACACAGAAGGAAGGTGCGACCAATAATAACAAAACTTAAAAATGCACATAGCACTATTAGTTTTTC
*****
```

STX2\_PHI\_272\_PHAGE\_HQ424691  
Stx2\_converting\_phase\_AP005154  
Stx2\_phase\_Min27\_EU311208  
Stx2\_Sakai\_BA000007  
Stx2\_933W\_AP004402  
STX2\_C227-11

```
TAAATATTGTATTTTTGTATTGACGAGTACCCTGTAACGAAGTTTGCCTAACAGCATTGTTGCTCTACGAGTTTCCAGCCTCCCCAGTGGCTGGC
TAAATATTGTATTTTTAAAGTATTGACGAGTAAACCTGTAACGAAGTTTGCCTAACAGCATTGTTGCTCTACGAGTTTCCAGCCTCCCCAGTGGCTGGC
TAAATATTGTATTTTTAAAGTATTGACGAGTAAACCTGTAACGAAGTTTGCCTAACAGCATTGTTGCTCTACGAGTTTCCAGCCTCCCCAGTGGCTGGC
TAAATATTGTATTTTTAAAGTATTGACGAGTAAACCTGTAACGAAGTTTGCCTAACAGCATTGTTGCTCTACGAGTTTCCAGCCTCCCCAGTGGCTGGC
TAAATATTGTATTTTTAAAGTATTGACGAGTAAACCTGTAACGAAGTTTGCCTAACAGCATTGTTGCTCTACGAGTTTCCAGCCTCCCCAGTGGCTGGC
TAAATATTGTATTTTTGTATTGACGAGTACCCTGTAACGAAGTTTGCCTAACAGCATTGTTGCTCTACGAGTTTCCAGCCTCCCCAGTGGCTGGC
*****
```

STX2\_PHI\_272\_PHAGE\_HQ424691  
Stx2\_converting\_phase\_AP005154  
Stx2\_phase\_Min27\_EU311208  
Stx2\_Sakai\_BA000007  
Stx2\_933W\_AP004402  
STX2\_C227-11

```
TTTTTTATGTCCTGAGCTCAAAGCAGCAATGTCGCTGGGCGTCGTGCAATTGGCGTTGAGCTGGAGACTGAACGTTTTGAGCAGACGGTCAGGGAAGT
TTTTTTATGTCCTGAGCTCAAAGCAGCAATGTCGCTGGGCGTCGTGCAATTGGCGTTGAGCTGGAGAGCGGGCGTTTTGAGCAGACGGTCAGGGAAGT
TTTTTTATGTCCTGAGCTCAAAGCAGCAATGTCGCTGGGCGTCGTGCAATTGGCGTTGAGCTGGAGAGCGGGCGTTTTGAGCAGACGGTCAGGGAAGT
TTTTTTATGTCCTGAGCTCAAAGCAGCAATGTCGCTGGGCGTCGTGCAATTGGCGTTGAGCTGGAGAGCGGGCGTTTTGAGCAGACGGTCAGGGAAGT
TTTTTTATGTCCTGAGCTCAAAGCAGCAATGTCGCTGGGCGTCGTGCAATTGGCGTTGAGCTGGAGAGCGGGCGTTTTGAGCAGACGGTCAGGGAAGT
TTTTTTATGTCCTGAGCTCAAAGCAGCAATGTCGCTGGGCGTCGTGCAATTGGCGTTGAGCTGGAGACTGAACGTTTTGAGCAGACGGTCAGGGAAGT
*****
```

STX2\_PHI\_272\_PHAGE\_HQ424691  
Stx2\_converting\_phase\_AP005154  
Stx2\_phase\_Min27\_EU311208  
Stx2\_Sakai\_BA000007  
Stx2\_933W\_AP004402  
STX2\_C227-11

```
TCAGGATTTAGTCAGTCAGACGAGTATTTGACGAGTATTAGTTACGCTACCGTTATTATCTCCTGCGCCGCGCCTTTAGCTCAGTGGTGGAGCGAGCGAC
TCAGAATGTAGTCAGTCAGACGAGTATTTGACGAGTATTAGTTACGCTACCGTTATTATCTCCTGCGCCGCGCCTTTAGCTCAGTGGTGGAGCGAGCGAC
TCAGAATGTAGTCAGTCAGACGAGTATTTGACGAGTATTAGTTACGCTACCGTTATTATCTCCTGCGCCGCGCCTTTAGCTCAGTGGTGGAGCGAGCGAC
TCAGAATGTAGTCAGTCAGACGAGTATTTGACGAGTATTAGTTACGCTACCGTTATTATCTCCTGCGCCGCGCCTTTAGCTCAGTGGTGGAGCGAGCGAC
TCAGAATGTAGTCAGTCAGACGAGTATTTGACGAGTATTAGTTACGCTACCGTTATTATCTCCTGCGCCGCGCCTTTAGCTCAGTGGTGGAGCGAGCGAC
TCAGAATTTAGTCAGTCAGACGAGTATTTGACGAGTATTAGTTACGCTACCGTTATTATCTCCTGCGCCGCGCCTTTAGCTCAGTGGTGGAGCGAGCGAC
****
```

STX2\_PHI\_272\_PHAGE\_HQ424691  
Stx2\_converting\_phase\_AP005154  
Stx2\_phase\_Min27\_EU311208  
Stx2\_Sakai\_BA000007  
Stx2\_933W\_AP004402  
STX2\_C227-11

```
TCATAATCGCCAGGTCGCTGGTTCAAATCAGCAAGGGCCACCATATCACATACGCCATTAGCTCATCGGGACAGAGCGCCAGCCTTCGAAGCTGGCTG
TCATAATCGCCAGGTCGCTGGTTCAAATCAGCAAGGGCCACCATATCACATACGCCATTAGCTCATCGGGACAGAGCGCCAGCCTTCGAAGCTGGCTG
TCATAATCGCCAGGTCGCTGGTTCAAATCAGCAAGGGCCACCATATCACATACGCCATTAGCTCATCGGGACAGAGCGCCAGCCTTCGAAGCTGGCTG
TCATAATCGCCAGGTCGCTGGTTCAAATCAGCAAGGGCCACCATATCACATACGCCATTAGCTCATCGGGACAGAGCGCCAGCCTTCGAAGCTGGCTG
TCATAATCGCCAGGTCGCTGGTTCAAATCAGCAAGGGCCACCATATCACATACGCCATTAGCTCATCGGGACAGAGCGCCAGCCTTCGAAGCTGGCTG
TCATAATCGCCAGGTCGCTGGTTCAAATCAGCAAGGGCCACCATATCACATACGCCATTAGCTCATCGGGACAGAGCGCCAGCCTTCGAAGCTGGCTG
*****
```

STX2\_PHI\_272\_PHAGE\_HQ424691  
Stx2\_converting\_phase\_AP005154  
Stx2\_phase\_Min27\_EU311208  
Stx2\_Sakai\_BA000007  
Stx2\_933W\_AP004402  
STX2\_C227-11

```
CGCGGGGTTGAGTCTCGATGCGCGTCCATTTATCTGCATTATGCGTTGTTAGCTCAGCGGACAGAGCAATTGCCTTCTGAGCAATCGTCACTGGTTTC
CGCGGGGTTGAGTCTCGATGCGCGTCCATTTATCTGCATTATGCGTTGTTAGCTCAGCGGACAGAGCAATTGCCTTCTGAGCAATCGTCACTGGTTTC
CGCGGGGTTGAGTCTCGATGCGCGTCCATTTATCTGCATTATGCGTTGTTAGCTCAGCGGACAGAGCAATTGCCTTCTGAGCAATCGTCACTGGTTTC
CGCGGGGTTGAGTCTCGATGCGCGTCCATTTATCTGCATTATGCGTTGTTAGCTCAGCGGACAGAGCAATTGCCTTCTGAGCAATCGTCACTGGTTTC
CGCGGGGTTGAGTCTCGATGCGCGTCCATTTATCTGCATTATGCGTTGTTAGCTCAGCGGACAGAGCAATTGCCTTCTGAGCAATCGTCACTGGTTTC
CGCGGGGTTGAGTCTCGATGCGCGTCCATTTATCTGCATTATGCGTTGTTAGCTCAGCGGACAGAGCAATTGCCTTCTGAGCAATCGTCACTGGTTTC
*****
```

STX2\_PHI\_272\_PHAGE\_HQ424691

GAATCCAGTACAACGCGGCATATTTATTACAGGCTCGCTTTTGGCGGCTTTTTATATCTGCGCGGGTCTGGTCTGATTACTTCAGCCAAAAGGA







Stx2\_phase\_Min27\_EU311208  
Stx2\_Sakai\_BA000007  
Stx2\_933W\_AP004402  
STX2\_C227-11

GGTGCAGTATGCAAATATAAACGACATCATTCGGCGGACCATTTGCTGCATGATGTGCAGGACATGAGCCGCTTAAACCATCCGAAAGCGGACCTGTCAA  
GGTGCAGTATGCAAATATAAACGACATCATTCGGCGGACCATTTGCTGCATGATGTGCAGGACATGAGCCGCTTAAACCATCCGAAAGCGGACCTGTCAA  
GGTGCAGTATGCAAATATAAACGACATCATTCGGCGGACCATTTGCTGCATGATGTGCAGGACATGAGCCGCTTAAACCATCCGAAAGCGGACCTGTCAA  
GGTGCAGTATGCAAATATAAACGACATCATTCGGCGGACCATTTGCTGCATGATGTGCAGGACATGAGCCGCTTAAACCATCCGAAAGCGGACCTGTCAA  
\*\*\*\*\*

STX2\_PHI\_272\_PHASE\_HQ424691  
Stx2\_converting\_phase\_AP005154  
Stx2\_phase\_Min27\_EU311208  
Stx2\_Sakai\_BA000007  
Stx2\_933W\_AP004402  
STX2\_C227-11

AGGGGCAGTACGAAACCGTGGGGCAGGGGCTGCATATCGCCAAAAAATGCTGCCGTTTATACCGCGGAATGCGGGCATTCTGCTGGTTCCGTGCTGTCCG  
AGGGGCAGTACGAAACCGTGGGGCAGGGGCTGCATATCGCCAAAAAATGCTGCCGTTTATACCGCGGAATGCGGGCATTCTGCTGGTTCCGTGCTGTCCG  
AGGGGCAGTACGAAACCGTGGGGCAGGGGCTGCATATCGCCAAAAAATGCTGCCGTTTATACCGCGGAATGCGGGCATTCTGCTGGTTCCGTGCTGTCCG  
AGGGGCAGTACGAAACCGTGGGGCAGGGGCTGCATATCGCCAAAAAATGCTGCCGTTTATACCGCGGAATGCGGGCATTCTGCTGGTTCCGTGCTGTCCG  
AGGGGCAGTACGAAACCGTGGGGCAGGGGCTGCATATCGCCAAAAAATGCTGCCGTTTATACCGCGGAATGCGGGCATTCTGCTGGTTCCGTGCTGTCCG  
\*\*\*\*\*

STX2\_PHI\_272\_PHASE\_HQ424691  
Stx2\_converting\_phase\_AP005154  
Stx2\_phase\_Min27\_EU311208  
Stx2\_Sakai\_BA000007  
Stx2\_933W\_AP004402  
STX2\_C227-11

TGGTGGTTCAGCGTTCCACCACCGGAGCCGATGGCACATACAGTGACCGGAGTGGTGCCTCGGAGAATTCAACCCCGTGGGTGTGGACAAGCCGCTGTAT  
TGGTGGTTCAGCGTTCCACCACCGGAGCCGATGGCACATACAGTGACCGGAGTGGTGCCTCGGAGAATTCAACCCCGTGGGTGTGGACAAGCCGCTGTAT  
TGGTGGTTCAGCGTTCCACCACCGGAGCCGATGGCACATACAGTGACCGGAGTGGTGCCTCGGAGAATTCAACCCCGTGGGTGTGGACAAGCCGCTGTAT  
TGGTGGTTCAGCGTTCCACCACCGGAGCCGATGGCACATACAGTGACCGGAGTGGTGCCTCGGAGAATTCAACCCCGTGGGTGTGGACAAGCCGCTGTAT  
TGGTGGTTCAGCGTTCCACCACCGGAGCCGATGGCACATACAGTGACCGGAGTGGTGCCTCGGAGAATTCAACCCCGTGGGTGTGGACAAGCCGCTGTAT  
\*\*\*\*\*

STX2\_PHI\_272\_PHASE\_HQ424691  
Stx2\_converting\_phase\_AP005154  
Stx2\_phase\_Min27\_EU311208  
Stx2\_Sakai\_BA000007  
Stx2\_933W\_AP004402  
STX2\_C227-11

AAGGACCTTATCGGTCGAAACAAAGCAGCACTGAAGAAGAACCAGAAAAATGCTGTTTGCCTGGTGTGGATGCAGGGGGAATTTGATTTTGACGGCA  
AAGGACCTTATCGGTCGAAACAAAGCAGCACTGAAGAAGAACCAGAAAAATGCTGTTTGCCTGGTGTGGATGCAGGGGGAATTTGATTTTGCCGCTA  
AAGGACCTTATCGGTCGAAACAAAGCAGCACTGAAGAAGAACCAGAAAAATGCTGTTTGCCTGGTGTGGATGCAGGGGGAATTTGATTTTGCCGCTA  
AAGGACCTTATCGGTCGAAACAAAGCAGCACTGAAGAAGAACCAGAAAAATGCTGTTTGCCTGGTGTGGATGCAGGGGGAATTTGATTTTGCCGCTA  
AAGGACCTTATCGGTCGAAACAAAGCAGCACTGAAGAAGAACCAGAAAAATGCTGTTTGCCTGGTGTGGATGCAGGGGGAATTTGATTTTGCCGCTA  
\*\*\*\*\*

STX2\_PHI\_272\_PHASE\_HQ424691  
Stx2\_converting\_phase\_AP005154  
Stx2\_phase\_Min27\_EU311208  
Stx2\_Sakai\_BA000007  
Stx2\_933W\_AP004402  
STX2\_C227-11

CGCCCGGAAATCAGCCAGCAGCTTTGGTGCCTGGTTGATAAATTCGCTGCAGACCTGACGGATATGGCAGGTCAAGTGGTGGCTCTGCTGGCGG  
CGCCCGGAAATCAGCCAGCAGCTTTGGTGCCTGGTTGATAAATTCGCTGCAGACCTGACGGATATGGCAGGTCAAGTGGTGGCTCTGCTGGCGG  
CGCCCGGAAATCAGCCAGCAGCTTTGGTGCCTGGTTGATAAATTCGCTGCAGACCTGACGGATATGGCAGGTCAAGTGGTGGCTCTGCTGGCGG  
CGCCCGGAAATCAGCCAGCAGCTTTGGTGCCTGGTTGATAAATTCGCTGCAGACCTGACGGATATGGCAGGTCAAGTGGTGGCTCTGCTGGCGG  
CGCCCGGAAATCAGCCAGCAGCTTTGGTGCCTGGTTGATAAATTCGCTGCAGACCTGACGGATATGGCAGGTCAAGTGGTGGCTCTGCTGGCGG  
\*\*\*\*\*

STX2\_PHI\_272\_PHASE\_HQ424691  
Stx2\_converting\_phase\_AP005154  
Stx2\_phase\_Min27\_EU311208  
Stx2\_Sakai\_BA000007  
Stx2\_933W\_AP004402  
STX2\_C227-11

TGTTCCCTGGATCTGGGAGATACGACGATTTTCTGGAAGCAGAAGAACGAATCTCTACAGCGGTGTACGGCAGCTACAAAAACAAACCGGAAAAAG  
TGTTCCCTGGATCTGGGGAACACGACGATTTTCTGGAAGCAGAAGAACGAATCTCAACGTACACAGCGGTGTATGGCAGCTATAAAAACAAACCGGAAAAAG  
TGTTCCCTGGATCTGGGGAACACGACGATTTTCTGGAAGCAGAAGAACGAATCTCAACGTACACAGCGGTGTATGGCAGCTATAAAAACAAACCGGAAAAAG  
TGTTCCCTGGATCTGGGGAACACGACGATTTTCTGGAAGCAGAAGAACGAATCTCAACGTACACAGCGGTGTATGGCAGCTATAAAAACAAACCGGAAAAAG  
TGTTCCCTGGATCTGGGGAACACGACGATTTTCTGGAAGCAGAAGAACGAATCTCAACGTACACAGCGGTGTATGGCAGCTATAAAAACAAACCGGAAAAAG  
\*\*\*\*\*

STX2\_PHI\_272\_PHASE\_HQ424691  
Stx2\_converting\_phase\_AP005154  
Stx2\_phase\_Min27\_EU311208  
Stx2\_Sakai\_BA000007  
Stx2\_933W\_AP004402  
STX2\_C227-11

AAATATCCATTTCTGACCGTTCATGACCGGATGAGAAGCGGGTGAATGTGCCGACGAAACAAACCGGAAAGAACCCGGACATTCGGGATATCGGGTATTACG  
AAATATCCATTTCTGACCGTTCATGACCGGATGAGAAGCGGGTGAATGTGCCGACGAAACAAACCGGAAAGAACCCGGACATTCGGGATATCGGGTATTACG  
AAATATCCATTTCTGACCGTTCATGACCGGATGAGAAGCGGGTGAATGTGCCGACGAAACAAACCGGAAAGAACCCGGACATTCGGGATATCGGGTATTACG  
AAATATCCATTTCTGACCGTTCATGACCGGATGAGAAGCGGGTGAATGTGCCGACGAAACAAACCGGAAAGAACCCGGACATTCGGGATATCGGGTATTACG  
AAATATCCATTTCTGACCGTTCATGACCGGATGAGAAGCGGGTGAATGTGCCGACGAAACAAACCGGAAAGAACCCGGACATTCGGGATATCGGGTATTACG  
\*\*\*\*\*

STX2\_PHI\_272\_PHASE\_HQ424691  
Stx2\_converting\_phase\_AP005154  
Stx2\_phase\_Min27\_EU311208  
Stx2\_Sakai\_BA000007  
Stx2\_933W\_AP004402  
STX2\_C227-11

GTTTCAAATGGCGTACAGCTCAGCCACCTGGACGTACAGGACAGGGCGAGCCATTTCAAGTTCATGGGCTCGCCGCGGGATTATTTCCAGCCGCTGCGC  
GTTTCAAATGGCGTACAGCTCAGCCACCTGGACGTACAGGACAGGGCGAGCCATTTCAAGTTCATGGGCTCGCCGCGGGATTATTTCCAGCCGCTGCGC  
GTTTCAAATGGCGTACAGCTCAGCCACCTGGACGTACAGGACAGGGCGAGCCATTTCAAGTTCATGGGCTCGCCGCGGGATTATTTCCAGCCGCTGCGC  
GTTTCAAATGGCGTACAGCTCAGCCACCTGGACGTACAGGACAGGGCGAGCCATTTCAAGTTCATGGGCTCGCCGCGGGATTATTTCCAGCCGCTGCGC  
GTTTCAAATGGCGTACAGCTCAGCCACCTGGACGTACAGGACAGGGCGAGCCATTTCAAGTTCATGGGCTCGCCGCGGGATTATTTCCAGCCGCTGCGC  
\*\*\*\*\*

STX2\_PHI\_272\_PHASE\_HQ424691  
Stx2\_converting\_phase\_AP005154  
Stx2\_phase\_Min27\_EU311208  
Stx2\_Sakai\_BA000007  
Stx2\_933W\_AP004402  
STX2\_C227-11

AACCGCGATTTTGGCCATTCGCGGAAGAGTGGCGCTAAACGCGGGGGCATCATCGACAGTATCAGAGTGCAGCCGATCATCGCCTTCGGGTGCAGAAAGCC  
AACCGCGATTTTGGCCATTCGCGGAAGAGTGGCGCTAAACGCGGGGGCATCATCGACAGTATCAGAGTGCAGCCGATCATCGCCTTCGGGTGCAGAAAGCC  
AACCGCGATTTTGGCCATTCGCGGAAGAGTGGCGCTAAACGCGGGGGCATCATCGACAGTATCAGAGTGCAGCCGATCATCGCCTTCGGGTGCAGAAAGCC  
AACCGCGATTTTGGCCATTCGCGGAAGAGTGGCGCTAAACGCGGGGGCATCATCGACAGTATCAGAGTGCAGCCGATCATCGCCTTCGGGTGCAGAAAGCC  
AACCGCGATTTTGGCCATTCGCGGAAGAGTGGCGCTAAACGCGGGGGCATCATCGACAGTATCAGAGTGCAGCCGATCATCGCCTTCGGGTGCAGAAAGCC  
\*\*\*\*\*

STX2\_PHI\_272\_PHASE\_HQ424691  
Stx2\_converting\_phase\_AP005154  
Stx2\_phase\_Min27\_EU311208  
Stx2\_Sakai\_BA000007  
Stx2\_933W\_AP004402  
STX2\_C227-11

ACAGCGCTCACAACACTGCTCTTTACCTTGCAGCAGTACAGGGAAGCCTGAAAGTACAGGATGGTACGCCAGTGGCGCAGGGCAGAAAGTGGTCA  
ACAGCGCTCACAACACTGCTCTTTACCTTGCAGCAGTACAGGGAAGCCTGAAAGTACAGGATGGTACGCCAGTGGCGCAGGGCAGAAAGTGGTCA  
ACAGCGCTCACAACACTGCTCTTTACCTTGCAGCAGTACAGGGAAGCCTGAAAGTACAGGATGGTACGCCAGTGGCGCAGGGCAGAAAGTGGTCA  
ACAGCGCTCACAACACTGCTCTTTACCTTGCAGCAGTACAGGGAAGCCTGAAAGTACAGGATGGTACGCCAGTGGCGCAGGGCAGAAAGTGGTCA  
ACAGCGCTCACAACACTGCTCTTTACCTTGCAGCAGTACAGGGAAGCCTGAAAGTACAGGATGGTACGCCAGTGGCGCAGGGCAGAAAGTGGTCA  
\*\*\*\*\*

STX2\_PHI\_272\_PHASE\_HQ424691  
Stx2\_converting\_phase\_AP005154  
Stx2\_phase\_Min27\_EU311208  
Stx2\_Sakai\_BA000007  
Stx2\_933W\_AP004402  
STX2\_C227-11

CGCATGCGGAGGAAACCGGAGGTAAGGCAGTGAAGCTGACCAAGGAAGCCGGTAAAGCAGCTGGGTGCTGGAGTACGCCGCGGGCAACCGTGGCGCTCT  
CGCATGCGGAGGAAACCGGAGGTAAGGCAGTGAAGCTGACCAAGGAAGCCGGTAAAGCAGCTGGGTGCTGGAGTACGCCGCGGGCAACCGTGGCGCTCT  
CGCATGCGGAGGAAACCGGAGGTAAGGCAGTGAAGCTGACCAAGGAAGCCGGTAAAGCAGCTGGGTGCTGGAGTACGCCGCGGGCAACCGTGGCGCTCT  
CGCATGCGGAGGAAACCGGAGGTAAGGCAGTGAAGCTGACCAAGGAAGCCGGTAAAGCAGCTGGGTGCTGGAGTACGCCGCGGGCAACCGTGGCGCTCT  
CGCATGCGGAGGAAACCGGAGGTAAGGCAGTGAAGCTGACCAAGGAAGCCGGTAAAGCAGCTGGGTGCTGGAGTACGCCGCGGGCAACCGTGGCGCTCT  
\*\*\*\*\*

STX2\_PHI\_272\_PHASE\_HQ424691  
Stx2\_converting\_phase\_AP005154  
Stx2\_phase\_Min27\_EU311208

GTTACAGAAAGGGGGCAGATTCGCTGCCGCTTAAAGTTCGGGAGCGCTGGCTGCGAACAGTATGTTATGGCGTTTACTGGCCGGTATCTTCACTG  
GTTACAGAAAGGGGGCAGATTCGCTGCCGCTTAAAGTTCGGGAGCGCTGGCTGCGAACAGTATGTTATGGCGTTTACTGGCCGGTATCTTCACTG  
GTTACAGAAAGGGGGCAGATTCGCTGCCGCTTAAAGTTCGGGAGCGCTGGCTGCGAACAGTATGTTATGGCGTTTACTGGCCGGTATCTTCACTG





Shiga toxin. Experiments with several EHEC strains, which routinely contain highly homologous lambdoid phages to the Stx2-encoding phage in C227-11, have demonstrated that this increase in toxin production is due to activation of the Pr' promoter. The Pr' promoter upstream of *stx2* in C227-11 is identical to that in EDL933, suggesting that Stx2 production by C277-11 will likewise be inducible with antibiotics.

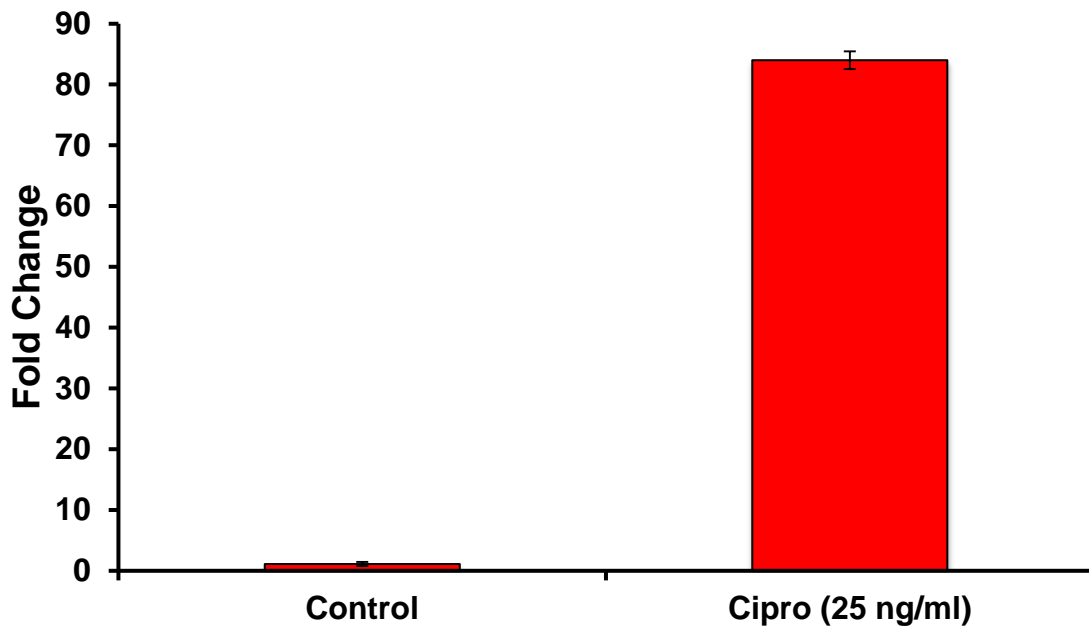

**Supplementary Figure 9.** Quantitative Reverse Transcriptase Polymerase Chain Reaction (qRT-PCR) to examine the induction of the Shiga-toxin genes by ciprofloxacin. The impact of antibiotics on C227-11 was examined using ciprofloxacin. Triplicate biological samples had RNA extracted after 6 hours of growth in LB media. The RNA was quantified and the expression level for the *stx2B* and *rpoA* gene were examined as previously described by Zhang et al <sup>26</sup> and Rasko et al <sup>27</sup> on biological duplicates. The graph demonstrates the increase in the expression level of the *stx2B* gene, using the *rpoA* gene for normalization. The level of expression in the strain not exposed to ciprofloxacin was normalized at 1 and the culture exposed to ciprofloxacin demonstrates an ~83 fold increase in gene expression. Error bars represent the standard deviation calculated using six datapoints (biological triplicates and technical duplicates for each).

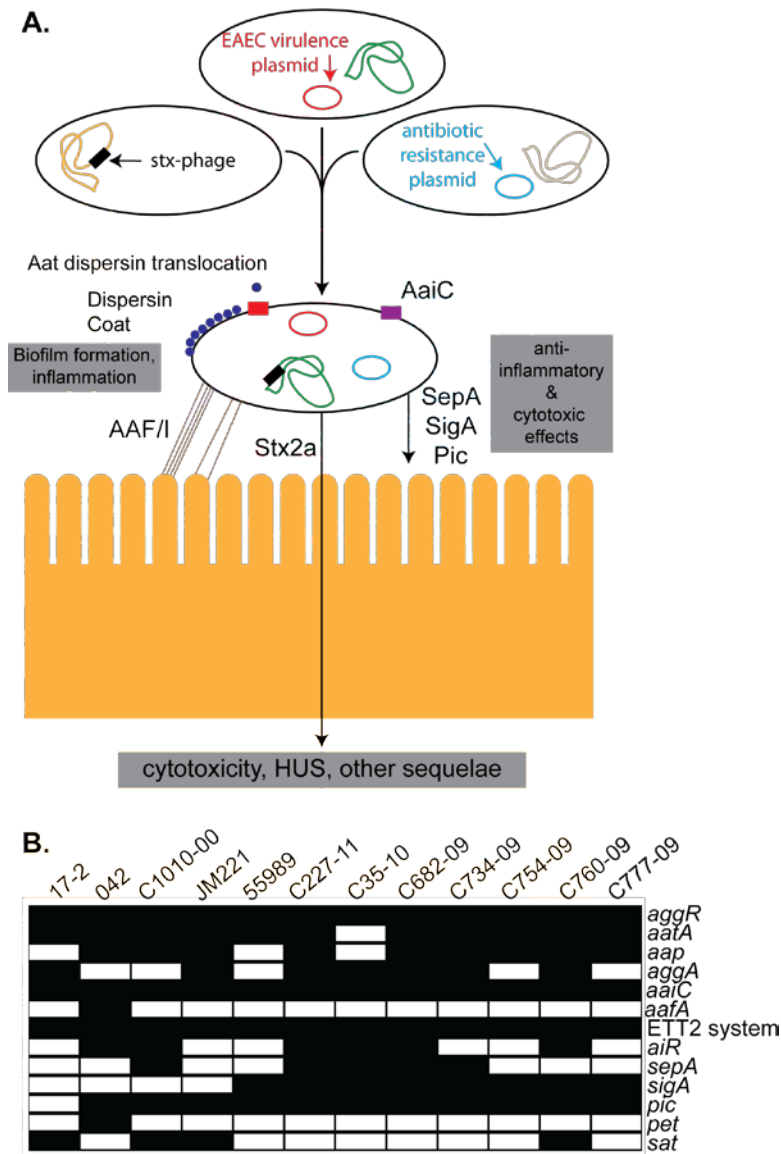

**Supplementary Figure 10.** Proposed model for the evolutionary origins of and increased virulence associated with the O104:H4 isolates from the German outbreak. **A)** Notable steps in the evolution of the outbreak strain included acquisition of an Stx2-phage (black box) and a plasmid containing the CTX-M beta lactamase gene (blue), as well as additional virulence factors, by an ancestral EAEC isolate containing an EAEC virulence plasmid (red). We hypothesize that collectively these factors enable the EAEC to bind to and remain closely associated with the intestinal epithelium, which may promote increased uptake of Stx2 into the blood stream. **B)** EAEC strains encode diverse assemblages of virulence factors. EAEC isolate names are listed across the top of the figure; filled boxes mark genes that are present. Note that the outbreak strain, C227-11, encodes an unusual assortment of SPATE components, including SepA, SigA and Pic.

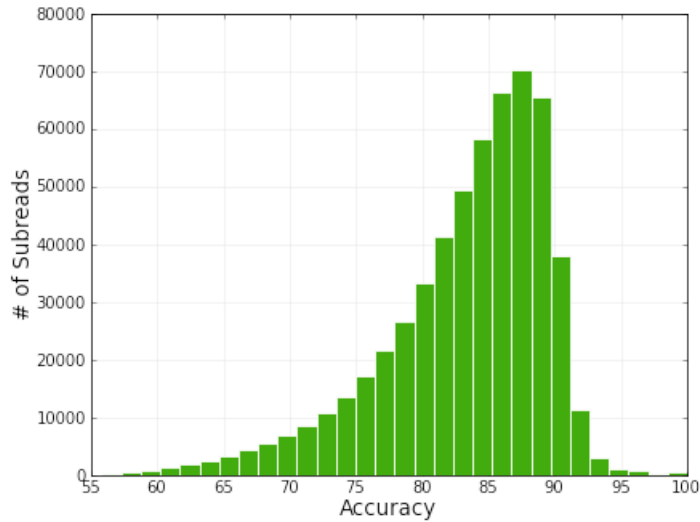

**Supplementary Figure 11.** Single pass read (subread) accuracy distribution for the continuous long read data generated for the C227-11 isolate. The mean accuracy of this distribution is 84.6%. However, given the long subread lengths generated in this study, the left tail of this distribution is longer than realized previously (Supplementary Methods), due to the fact that very long reads can be mapped with extremely high precision even at low accuracy. Therefore, one consequence of longer reads is reduced mean accuracy. As a result, a more accurate representation of the accuracy distribution is the mode, which in the C227-11 distribution shown here is at 88.2% accuracy.

**Supplementary Table 1.** PacBio *RS* continuous long-read sequencing statistics for the 12 *E. coli* isolates (from the isolates described in Table 1 of the main text). The number of post-filter reads (2<sup>nd</sup> column) represents the number of raw reads used in the analysis after filtering out low accuracy (< 75%) and short reads (< 100bp). The number of mapped reads (3<sup>rd</sup> column) indicate how many of the filtered reads from column 2 could be mapped to the TY-2482 or 55989 genomes. The mean (or mode) single-pass accuracy represent the mean (or mode) of the single pass accuracy distribution, while the consensus accuracy column represents the accuracy of the consensus sequence. The mean read length and 95<sup>th</sup> percentile read length represent the mean raw sequence read length and the read length of raw reads at the 95<sup>th</sup> percentile of the raw read length distribution (the read length distribution is exponential), respectively. Mean depth of coverage provides the amount of fold-coverage achieved for each genome. The per SMRTcell sequencing time provides the time in minutes it took to carry out a single sequencing run per SMRTcell, the number of SMRTcells indicates the number of SMRTcells run to get at the mean depth of coverage reported, and the final column is simple the product of the previous two columns, where minutes were then converted to hours.

| Strain        | # of post-filter reads | # of mapped reads | Single-pass accuracy Mean (%)‡ | Consensus accuracy (%) | Mean readlength (bp) | 95 <sup>th</sup> percentile readlength (bp) | Mean SMRTBell readlength (bp) | 95 <sup>th</sup> percentile SMRTBell readlength (bp) | Mean depth of coverage | Per SMRTcell Seq Time (min) | # SMRT cells | Total Time for Collection (hours) |
|---------------|------------------------|-------------------|--------------------------------|------------------------|----------------------|---------------------------------------------|-------------------------------|------------------------------------------------------|------------------------|-----------------------------|--------------|-----------------------------------|
| O42           | 495,931                | 215,414           | 84.2 (87.2)                    | 99.998                 | 1923                 | 5003                                        | 2527                          | 6829                                                 | 75.3                   | 90                          | 9            | 15.75                             |
| 17-2          | 254,237                | 148,330           | *                              | NA                     | 1953                 | 5096                                        | 2503                          | 6710                                                 | 52.5                   | 90                          | 6            | 10.5                              |
| JM221         | 267,603                | 175,551           | *                              | NA                     | 2271                 | 5795                                        | 2810                          | 7351                                                 | 73.4                   | 90                          | 8            | 14                                |
| C1010-00      | 407,475                | 294,567           | *                              | NA                     | 1873                 | 4697                                        | 2376                          | 6364                                                 | 100.8                  | 90                          | 12           | 21                                |
| 55989         | 186,794                | 162,912           | 84.4 (88.3)                    | 99.999                 | 2142                 | 5260                                        | 2572                          | 6713                                                 | 63.4                   | 90                          | 6            | 10.5                              |
| C227-11       | 648,177                | 475,926           | 85.0 (88.2)                    | 99.975                 | 2191                 | 5711                                        | 2900                          | 7811                                                 | 190.7                  | 120                         | 24           | 48                                |
| C35-10        | 362,535                | 223,253           | *                              | NA                     | 1818                 | 4818                                        | 2196                          | 6080                                                 | 73.3                   | 90                          | 12           | 21                                |
| C682-09       | 257,792                | 195,513           | *                              | NA                     | 2003                 | 5120                                        | 2287                          | 6078                                                 | 70.2                   | 90                          | 12           | 21                                |
| C734-09       | 328,472                | 154,014           | *                              | NA                     | 2135                 | 5866                                        | 2369                          | 6462                                                 | 59.6                   | 90                          | 10           | 17.5                              |
| C754-09       | 166,002                | 80,917            | *                              | NA                     | 2169                 | 5851                                        | 2364                          | 6378                                                 | 31.5                   | 90                          | 13           | 22.75                             |
| C760-09       | 537,878                | 254,893           | *                              | NA                     | 2094                 | 5523                                        | 2411                          | 6306                                                 | 96.7                   | 90                          | 14           | 24.5                              |
| C777-09       | 140,689                | 74,932            | *                              | NA                     | 2255                 | 5886                                        | 2714                          | 7330                                                 | 31.1                   | 90                          | 11           | 19.25                             |
| C227-11 (CCS) | 419,589                | 416,656           | 97.8 (99.9)                    | NA                     | 430                  | 740                                         | 3076                          | 8527                                                 | 35.05                  | 90                          | 32           | 56                                |

\* denotes accuracies that could not be computed without a reference sequence. Similar chemistries used for all samples should result in little accuracy variation.

‡ The percentage indicated in parentheses, when present, represents the mode of the single-pass accuracy distribution

NA Indicates measurement not applicable



**Supplementary Table 2.** Single reads spanning > 95% of the 1,549bp plasmid at least five times. The read id corresponds to the id in the SRA submission of the C227-11 sequence data. The CCS length indicates the size of the insert in the SMRTbell construct for the indicated read. The number of passes indicates the number of times the DNA polymerase enzyme traversed the SMRTbell construct for the indicated read. The full sequence length of the read indicates how many bases were sequenced in the read, and the CCS accuracy indicates the percent of nucleotides in the pTY-3 plasmid that matched the consensus sequence of the consensus sequence for the indicated read (the accuracy is not expected to be 100% given real sequence differences that may exist in this plasmid between the TY-2482 and C227-11 genomes).

| <b>Read ID</b> | <b>CCS Length</b> | <b># Passes</b> | <b>Readlength</b> | <b>CCS Accuracy (vs. TY-2482)</b> |
|----------------|-------------------|-----------------|-------------------|-----------------------------------|
| 54845          | 1507              | 6               | 10333             | 97.4%                             |
| 28873          | 1510              | 6               | 9266              | 98.1%                             |
| 11743          | 1524              | 7               | 11744             | 98.4%                             |
| 30326          | 1538              | 6               | 9654              | 99.5%                             |
| 18647          | 1540              | 6               | 9688              | 99.6%                             |
| 61841          | 1554              | 5               | 8913              | 99.2%                             |

**Supplementary Table 3.** Comparison of publicly available genome assemblies from German outbreak strain isolates to TY-2482. Different genome assemblies from different outbreak isolates and related strains were compared against reference genomes (listed in column 1). The genomes being compared are given in column two (see Table 1 of main text for details). The two C227-11 assemblies listed are described in the Supplementary Methods. The Coverage column indicates the percentage of nucleotides in the reference assembly covered by the indicated strain, and the Identity column indicates the percentage of nucleotides that are identical between the indicated strain and the indicated reference strain. Under the assumption that the resequencing pipeline approximates the true sequence for C277-11, we can conservatively estimate the accuracy of our *de novo* assembly of C227-11 as 99.97, given that 0.02-0.03 of the identity difference to TY-2482 likely represents true variation between strains.

| <b>Data</b>              | <b>Coverage</b> | <b>Identity</b> | <b>Alignment/Snp Calling</b> |
|--------------------------|-----------------|-----------------|------------------------------|
| H1121                    | 97.90%          | 99.98%          | Nucmer; Show-snps            |
| LB226                    | 98.88%          | 99.90%          | Nucmer; Show-snps            |
| C227-11 de novo assembly | 99.67%          | 99.95%          | Nucmer; Show-snps            |
| C227-11 resequencing     | 99.96%          | 99.97%          | Nucmer; Show-snps            |
| C227-11 resequencing     | 100.00%         | 99.98%          | Blasr; EviCons               |

**Supplementary Table 4.** Isolates in Whole Genome Phylogeny. Genomes for 53 *E. coli* strain isolates were used to produce Figure 2 in the main text. The id's, pathotype, and Genbank accession number for these 53 isolates are provided in this table.

| Isolate                              | Pathotype       | Genbank Accession |
|--------------------------------------|-----------------|-------------------|
| <i>E. coli</i> 536                   | ExPEC           | CP000247.1        |
| <i>E. coli</i> B7A                   | EPEC            | AAJT00000000      |
| <i>E. coli</i> ABU 83972             | ExPEC           | CP001671          |
| <i>E. coli</i> APEC O1               | ExPEC           | CP000468.1        |
| <i>E. coli</i> ATCC 8739             | ExPEC           | CP000946.1        |
| <i>E. coli</i> BL21                  | Lab/Commensal   | AM946981          |
| <i>E. coli</i> CFT073                | ExPEC           | AE014075.1        |
| <i>E. coli</i> ED1                   | Lab/Commensal   | CU928162.2        |
| <i>E. coli</i> E24377A               | EPEC            | CP000800.1        |
| <i>E. coli</i> H10407                | EPEC            | FN649414          |
| <i>E. coli</i> HS                    | Lab/Commensal   | CP000802.1        |
| <i>E. coli</i> IA11                  | Fecal           | CU928160.2        |
| <i>E. coli</i> IA139                 | ExPEC           | CU928164.2        |
| <i>E. coli</i> IHE3034               | ExPEC           | CP001969          |
| <i>E. coli</i> O103:H2 str. 12009    | EHEC            | AP010958.1        |
| <i>E. coli</i> O111:H- str. 11128    | EHEC            | AP010960.1        |
| <i>E. coli</i> O127:H6 str. E2348/69 | EPEC            | FM180568.1        |
| <i>E. coli</i> O157:H7 str. EC4115   | EHEC            | CP001164.1        |
| <i>E. coli</i> O157:H7 str. EDL933   | EHEC            | AE005174.2        |
| <i>E. coli</i> O157:H7 str. Sakai    | EHEC            | BA000007.2        |
| <i>E. coli</i> O26:H11 str. 11368    | EHEC            | AP010953.1        |
| <i>E. coli</i> O55:H7 str. CB9615    | EHEC            | CP001846.1        |
| <i>E. coli</i> SE11                  | Fecal           | AP009240.1        |
| <i>E. coli</i> SMS-3-5               | Environmental   | CP000970.1        |
| <i>E. coli</i> UMN026                | ExPEC           | CU928163.2        |
| <i>E. coli</i> UTI89                 | ExPEC           | CP000243.1        |
| <i>E. coli</i> K12 DH10B             | Lab/Commensal   | CP000948.1        |
| <i>E. coli</i> K12 W3110             | Lab/Commensal   | AP009048.1        |
| <i>E. coli</i> B171                  | EPEC            | AAJX00000000      |
| <i>E. coli</i> 55989                 | EAEC            | CU928145.2        |
| <i>E. coli</i> 042                   | EAEC            | FN554766          |
| <i>E. coli</i> 101-1                 | EAEC            | AAMK00000000      |
| <i>E. coli</i> TY-2482               | EAEC            | TBD               |
| <i>E. coli</i> LB226692              | EAEC            | AFOB00000000      |
| <i>E. coli</i> H112180280            | EAEC            | TBD               |
| <i>E. coli</i> 17-2                  | EAEC            | TBD               |
| <i>E. coli</i> JM221                 | EAEC            | TBD               |
| <i>E. coli</i> C1010-00              | EAEC            | TBD               |
| <i>E. coli</i> C35-10                | EAEC            | TBD               |
| <i>E. coli</i> C682-09               | EAEC            | TBD               |
| <i>E. coli</i> C734-09               | EAEC            | TBD               |
| <i>E. coli</i> C754-09               | EAEC            | TBD               |
| <i>E. coli</i> C760-09               | EAEC            | TBD               |
| <i>E. coli</i> C777-09               | EAEC            | TBD               |
| <i>E. coli</i> C227-11               | EAEC            | TBD               |
| <i>E. coli</i> 53638                 | EIEC            | AAKB00000000      |
| <i>S. boydii</i> CDC 3083-94         | <i>Shigella</i> | CP001063.1        |
| <i>S. boydii</i> Sb227               | <i>Shigella</i> | CP000036.1        |
| <i>S. dysenteriae</i> Sd197          | <i>Shigella</i> | CP000034.1        |
| <i>S. dysenteriae</i> 1012           | <i>Shigella</i> | AAMJ00000000      |
| <i>S. flexneri</i> 2a str. 2457T     | <i>Shigella</i> | AE014073.1        |
| <i>S. flexneri</i> 5 str. 8401       | <i>Shigella</i> | CP000266.1        |
| <i>S. sonnei</i> Ss046               | <i>Shigella</i> | CP000038.1        |

**Supplementary Table 5.** Known virulence factors mapped to the EAEC isolates sequenced in this study, with an indicator of presence in other EAEC isolates sequenced as described in the main text. The genome sequence (described in columns B-F) for the virulence factor (column A describes the factor and column B describes the original isolate from which the factor was identified) was mapped against all of the raw sequence reads for each of the twelve strains sequenced in this study. The number of sequences to which the factor sequence was aligned was then normalized by the factor's sequence length (the longer the sequence, the more hits we would expect) and used as a measure to determine presence of a given factor in a given genome. These adjusted counts are given in columns H-R for the twelve strains we sequenced. An adjusted count > 0 indicates the presence of a virulence factor in the associated strain. Mappings to individual raw reads (rather than consensus sequences) were carried out to enhance the sensitivity of identifying factors in the different genomes, given the long read lengths achieved via the SMRT sequencing runs.

| UNIQID                        | Original isolate | Gene name                | start_coo | end_coo | GenBank Accession Number | Inclusion in list | 55989 | 17-2 | O42  | JM221 | C1010-00 | C35-10 | C682-09 | C734-09 | C754-09 | C760-09 | C777-10 | C227-11 |      |
|-------------------------------|------------------|--------------------------|-----------|---------|--------------------------|-------------------|-------|------|------|-------|----------|--------|---------|---------|---------|---------|---------|---------|------|
| aaIA                          | Ec042            | EC042_pAA048             | 39652     | 40134   | FN554767                 | AggR regulated    | 0.0   | 0.0  | 0.4  | 0.0   | 0.0      | 0.0    | 0.0     | 0.0     | 0.0     | 0.0     | 0.0     | 0.0     |      |
| AaIA_Ec042_FN554767.1         | Ec042            | EC042_pAA048             | 39652     | 40134   | FN554767                 | AggR regulated    | 0.0   | 0.0  | 2.1  | 0.0   | 0.0      | 0.0    | 0.0     | 0.0     | 0.0     | 0.0     | 0.0     | 0.0     |      |
| aaIB_Ec042_FN554767.1         | Ec042            | EC042_pAA030             | 22994     | 22554   | FN554767                 | AggR regulated    | 0.0   | 0.0  | 9.9  | 0.0   | 0.0      | 0.0    | 0.0     | 0.0     | 0.0     | 0.0     | 0.0     | 0.0     |      |
| aaIC                          | Ec042            | EC042_pAA031             | 25533     | 23011   | FN554767                 | AggR regulated    | 0.0   | 0.0  | 13.3 | 0.0   | 0.0      | 16.8   | 0.0     | 0.0     | 0.0     | 0.0     | 0.0     | 0.0     |      |
| aaID_Ec042_FN554767.1         | Ec042            | EC042_pAA046             | 38499     | 39248   | FN554767                 | AggR regulated    | 0.0   | 0.0  | 13.6 | 0.0   | 0.0      | 0.0    | 0.0     | 0.0     | 0.0     | 0.0     | 0.0     | 0.0     |      |
| aaI_pathogenicity_island      | Ec042            | EC042_4562 to ECO42_4577 | 5647      | 6885    | FN554767                 | AggR regulated    | 31.5  | 33.9 | 15.3 | 32.2  | 17.9     | 4.5    | 12.2    | 14.0    | 30.2    | 8.1     | 25.3    | 12.5    |      |
| aaIA                          | Ec042_pAA        | EC042_pAA006             | 6965      | 7603    | FN554767                 | AggR regulated    | 0.9   | 7.1  | 6.2  | 3.2   | 3.2      | 3.0    | 12.0    | 14.6    | 5.9     | 8.6     | 5.8     | 0.0     |      |
| aaIB                          | Ec042_pAA        | EC042_pAA009             | 6965      | 7603    | FN554767                 | AggR regulated    | 0.8   | 0.0  | 0.0  | 0.0   | 0.3      | 0.0    | 0.0     | 0.0     | 1.0     | 0.0     | 0.6     | 0.0     |      |
| aaIC                          | Ec042_pAA        | EC042_pAA010             | 7596      | 8225    | FN554767                 | AggR regulated    | 1.6   | 1.5  | 1.1  | 2.0   | 0.3      | 0.8    | 0.0     | 2.4     | 1.4     | 0.3     | 0.8     | 0.2     |      |
| aaID                          | Ec042_pAA        | EC042_pAA011             | 8237      | 9451    | FN554767                 | AggR regulated    | 7.9   | 9.0  | 5.1  | 6.5   | 3.0      | 3.0    | 0.0     | 11.0    | 13.7    | 6.7     | 11.3    | 4.8     |      |
| agg3a_55989                   | 55989            | agg3a_55989              | 4258      | 4755    | AF411067.1               | AggR regulated    | 11.4  | 0.0  | 0.0  | 0.0   | 0.0      | 0.0    | 0.0     | 0.0     | 9.2     | 4.5     | 7.6     | 0.0     |      |
| agg3B_55989                   | 55989            | agg3B_55989              | 3643      | 4083    | AF411067.1               | AggR regulated    | 2.4   | 0.0  | 0.0  | 0.0   | 0.0      | 0.0    | 0.0     | 0.0     | 4.1     | 1.0     | 3.6     | 0.0     |      |
| agg3C_55989                   | 55989            | agg3C_55989              | 1083      | 3629    | AF411067.1               | AggR regulated    | 28.9  | 0.0  | 0.0  | 0.0   | 0.0      | 0.0    | 0.0     | 0.0     | 29.4    | 9.4     | 26.5    | 0.0     |      |
| agg3D_55989                   | 55989            | agg3D_55989              | 277       | 1029    | AF411067.1               | AggR regulated    | 14.5  | 0.0  | 0.0  | 0.0   | 0.0      | 0.0    | 0.0     | 0.0     | 14.9    | 7.5     | 18.5    | 0.0     |      |
| agg4a_C1010-00                | C1010-00         | agg4a_C1010-00           | 3780      | 4292    | EU637023.1               | AggR regulated    | 0.0   | 0.0  | 0.0  | 0.0   | 7.3      | 0.0    | 0.0     | 0.0     | 0.0     | 0.0     | 0.0     | 0.0     |      |
| agg4B_C1010-00                | C1010-00         | agg4B_C1010-00           | 3278      | 3706    | EU637023.1               | AggR regulated    | 0.0   | 0.0  | 0.0  | 0.0   | 2.5      | 0.0    | 0.0     | 0.0     | 0.0     | 0.0     | 0.0     | 0.0     |      |
| agg4c_C1010-00                | C1010-00         | agg4c_C1010-00           | 733       | 3261    | EU637023.1               | AggR regulated    | 0.0   | 0.0  | 0.0  | 0.0   | 15.0     | 0.0    | 0.0     | 0.0     | 0.0     | 0.0     | 0.0     | 0.0     |      |
| agg4D_C1010-00                | C1010-00         | agg4D_C1010-00           | 1         | 684     | EU637023.1               | AggR regulated    | 0.0   | 0.0  | 0.0  | 0.0   | 10.9     | 0.0    | 0.0     | 0.0     | 0.0     | 0.0     | 0.0     | 0.0     |      |
| aggA                          | Ec042            | EC042_pAA052             | 41877     | 41080   | FN554767                 | AggR regulated    | 0.0   | 0.0  | 0.0  | 0.0   | 0.0      | 0.4    | 0.0     | 1.1     | 0.0     | 0.0     | 0.0     | 0.5     |      |
| aggA_17-2_U12894.1            | 17-2             | aggA_17-2_U12894.1       | 3985      | 4500    | U12894                   | AggR regulated    | 0.0   | 16.6 | 0.0  | 3.9   | 0.0      | 3.4    | 0.0     | 10.1    | 0.0     | 3.1     | 0.0     | 7.6     |      |
| aggB_17-2_U12894.1            | 17-2             | aggB_17-2_U12894.1       | 3435      | 3440    | U12894                   | AggR regulated    | 0.0   | 1.8  | 0.0  | 4.8   | 0.0      | 2.3    | 0.0     | 11.5    | 0.0     | 4.1     | 0.0     | 6.4     |      |
| aggC_17-2_U12894.1            | 17-2             | aggC_17-2_U12894.1       | 905       | 3433    | U12894                   | AggR regulated    | 0.0   | 22.7 | 0.0  | 16.4  | 0.0      | 2.8    | 0.0     | 29.4    | 0.0     | 10.6    | 0.0     | 14.4    |      |
| aggD_17-2_U12894.1            | 17-2             | aggD_17-2_U12894.1       | 133       | 891     | U12894                   | AggR regulated    | 0.0   | 9.6  | 0.0  | 12.3  | 0.0      | 6.3    | 0.0     | 8.3     | 0.0     | 5.4     | 0.0     | 7.6     |      |
| aggR                          | Ec042_pAA        | EC042_pAA052             | 41877     | 41080   | FN554767                 | AggR regulated    | 0.0   | 0.4  | 0.0  | 0.4   | 0.5      | 0.0    | 0.0     | 0.0     | 0.0     | 0.3     | 0.7     | 0.0     |      |
| aggR gene                     | 55989            | aggR                     | 48186     | 47389   | CU928159.2               | AggR regulated    | 21.7  | 19.4 | 9.1  | 13.4  | 0.0*     | 10.1   | 0.0     | 30.1    | 27.1    | 15.8    | 17.9    | 18.2    |      |
| capU                          | Ec042            | capU                     | 1403      | 2224    | AF134403                 | AggR regulated    | 3.9   | 3.9  | 11.2 | 0.0   | 0.0      | 5.7    | 2.2     | 3.4     | 3.0     | 4.0     | 3.3     | 22.3    |      |
| gi 284919779:4251642-4251935  | Ec042            | EC042_4006               | 990336    | 990043  | FN554766                 | AggR regulated    | 0.6   | 2.9  | 24.1 | 2.2   | 2.6      | 1.1    | 1.2     | 1.4     | 0.0     | 12.4    | 0.0     | 0.0     |      |
| gi 284919779:c3401924-3401280 | Ec042            | EC042_3184               | 1840054   | 1840698 | FN554766                 | AggR regulated    | 0.0   | 0.0  | 9.3  | 0.0   | 10.9     | 0.0    | 0.0     | 0.0     | 0.0     | 0.0     | 0.0     | 3.3     |      |
| gi 284920982 emb CBG34047.1   | Ec042            | EC042_1227               | 3937251   | 3937552 | FN554766                 | AggR regulated    | 29.5  | 33.1 | 26.7 | 45.5  | 30.6     | 30.1   | 19.6    | 23.4    | 28.1    | 26.9    | 31.9    | 0.0*    |      |
| gi 284921986 emb CBG35074.1   | Ec042            | EC042_2242               | 2906559   | 2903440 | FN554766                 | AggR regulated    | 13.2  | 48.0 | 49.2 | 46.1  | 54.6     | 22.1   | 25.8    | 28.4    | 19.9    | 36.1    | 20.6    | 1.3     |      |
| gi 284921997 emb CBG35075.1   | Ec042            | EC042_2243               | 2903325   | 2900803 | FN554766                 | AggR regulated    | 13.4  | 56.7 | 40.8 | 43.1  | 57.9     | 16.4   | 19.2    | 18.2    | 14.6    | 43.4    | 16.9    | 0.0     |      |
| gi 284921999 emb CBG35077.1   | Ec042            | EC042_2244A              | 2900193   | 2899960 | FN554766                 | AggR regulated    | 6.7   | 32.0 | 26.4 | 22.1  | 31.3     | 7.5    | 11.5    | 7.9     | 15.6    | 18.6    | 9.8     | 27.1    |      |
| gi 284922918 emb CBG36007.1   | Ec042            | EC042_3181               | 1842773   | 1843042 | FN554766                 | AggR regulated    | 5.0   | 4.6  | 20.6 | 7.6   | 6.8      | 3.5    | 12.0    | 9.5     | 10.4    | 1.7     | 4.6     | 44.2    |      |
| gi 284922919 emb CBG36008.1   | Ec042            | EC042_3182               | 1842056   | 1842694 | FN554766                 | AggR regulated    | 6.1   | 8.4  | 14.1 | 9.9   | 11.5     | 0.0    | 0.0     | 0.0     | 0.0     | 3.9     | 4.5     | 24.3    |      |
| gi 284922920 emb CBG36009.1   | Ec042            | EC042_3183               | 1840839   | 1842071 | FN554766                 | AggR regulated    | 9.6   | 14.3 | 24.1 | 20.7  | 14.9     | 2.5    | 8.0     | 12.7    | 12.2    | 6.3     | 11.3    | 12.3    |      |
| gi 284922922 emb CBG36012.1   | Ec042            | EC042_3187               | 1836409   | 1838196 | FN554766                 | AggR regulated    | 10.4  | 18.1 | 36.0 | 23.1  | 13.8     | 3.9    | 14.5    | 19.6    | 17.4    | 9.4     | 11.6    | 12.1    |      |
| gi 284924231 emb CBG37331.1   | Ec042            | EC042_4509               | 404698    | 405153  | FN554766                 | AggR regulated    | 6.7   | 12.3 | 13.7 | 28.7  | 2.8      | 3.6    | 15.5    | 16.9    | 6.4     | 13.0    | 15.0    | 0.0     |      |
| gi 284924466 emb CBG37594.1   | Ec042            | EC042_4772               | 122940    | 123761  | FN554766                 | AggR regulated    | 13.5  | 22.3 | 16.1 | 0.0   | 0.0      | 9.7    | 17.7    | 16.8    | 13.7    | 16.1    | 9.2     | 11.4    |      |
| gi 284924582:17497-18447_Virk | Ec042_pAA        | EC042_pAA023             | 17497     | 18447   | FN554767                 | AggR regulated    | 10.0  | 14.6 | 26.4 | 0.0   | 0.0      | 12.7   | 7.5     | 10.3    | 11.9    | 13.9    | 12.7    | 18.1    |      |
| gi 284924584 emb CBG27756.1   | Ec042_pAA        | EC042_pAA003             | 1397      | 2425    | FN554767                 | AggR regulated    | 7.0   | 14.9 | 4.7  | 8.6   | 4.7      | 4.2    | 0.0     | 11.3    | 10.1    | 8.9     | 4.7     | 14.3    |      |
| espP                          | Ec042_pAA        | EPEC                     | 55788     | 59690   | HM138194                 | SPATE             | 0.0   | 0.0* | 0.0* | 0.0*  | 0.0*     | 0.0    | 0.0     | 0.0     | 0.0*    | 0.0     | 0.0     | 0.0     | 14.5 |
| pic                           | Ec042_pAA        | EC042_pAA035             | 28073     | 31960   | FN554767                 | SPATE             | 20.4  | 0.0* | 0.0* | 0.0   | 0.0*     | 4.3    | 17.7    | 23.4    | 24.5    | 11.4    | 18.2    | 8.4     |      |
| sat                           | CFT073           | c3619                    | 3460261   | 3456362 | AE014075                 | SPATE             | 39.4  | 0.0  | 26.4 | 28.6  | 27.2     | 9.9    | 54.1    | 59.6    | 41.0    | 26.8    | 37.3    | 8.5     |      |
| sepA                          | S. flexneri M90T | sepA                     | 262       | 4362    | Z48219                   | SPATE             | 37.0  | 27.6 | 0.0  | 17.1  | 53.5     | 32.9   | 0.0     | 87.2    | 21.7    | 17.4    | 23.0    | 0.0     |      |
| air                           | 55989            | air                      | 3567798   | 3566278 | CU928145                 |                   | 12.0  | 15.1 | 19.8 | 23.4  | 15.5     | 18.7   | 16.2    | 18.5    | 11.8    | 16.8    | 13.0    | 53.1    |      |
| astA                          | 55989            | astA                     | 53198     | 53082   | CU928159.2               |                   | 0.9   | 2.3  | 3.5  | 0.0   | 0.0      | 0.0    | 0.0     | 0.0     | 0.0     | 0.0     | 0.0     | 0.0     |      |
| EAST1                         | EAEC             | EAST1                    | 61        | 177     | L11241                   |                   |       |      |      |       |          |        |         |         |         |         |         |         | 0.0  |
| gi 284924585 emb CBG27757.1   | Ec042_pAA        | EC042_pAA004             | 2429      | 2968    | FN554767                 |                   | 7.9   | 7.6  | 4.1  | 2.2   | 4.5      | 4.5    | 0.0     | 7.8     | 8.1     | 3.7     | 7.3     | 16.1    |      |
| rmoA                          | N/A              | aida                     | 1947      | 5810    | GU810159                 |                   | 0.0   | 0.0  | 0.0  | 0.0   | 0.0      | 0.0    | 0.0     | 0.0     | 0.0     | 0.0     | 0.0     | 65.1    |      |
| sisAB                         | CFT073           | ShIA                     | 3408019   | 3409062 | AE014075                 |                   | 0.0   | 14.7 | 0.0  | 5.8   | 3.7      | 0.3    | 0.0     | 0.0     | 0.0     | 6.8     | 0.0     | 1.0     |      |
| ydiE(hemP)                    | 55989            | hemP                     | 1938245   | 1938436 | CU928145                 |                   | 31.7  | 38.9 | 61.8 | 65.9  | 47.5     | 50.5   | 50.1    | 35.6    | 34.5    | 36.9    | 31.2    | 59.7    |      |

\* indicates evidence for truncated or internally rearranged sequence

**Supplementary Table 6.** Investigation of the prevalence of unique regions from C227-11 when compared to 55989 and other EAEC isolates. Similar to the virulence factor mapping described in Supplementary Table 5, we mapped raw reads from the twelve EAEC strains we sequenced to the complete German outbreak reference genome indicated in column A (TY-2482) to identify regions that were not covered by sequence from the different EAEC strains. Those regions for which at least one of the non-C227-11 strains had an adjusted coverage count of 0 (as described in Supplementary Table 5 legend) are included in this table, with coordinates for the region with respect to the complete TY-2482 genome given in columns B-D.

| location    | end5    | end3    | span  | 55989 | 17-2 | O42  | JM221 | C1010-00 | C35-10 | C682-09 | C734-09 | C754-09 | C760-09 | C777-10 | C227-11 |
|-------------|---------|---------|-------|-------|------|------|-------|----------|--------|---------|---------|---------|---------|---------|---------|
| ECO_TY2482_ | 2503    | 3705    | 1202  | 0.0   | 0.0  | 0.0  | 41.5  | 0.0      | 32.4   | 23.6    | 50.3    | 0.0     | 0.0     | 0.0     | 31.5    |
| ECO_TY2482_ | 11303   | 12343   | 1040  | 0.0   | 0.0  | 0.0  | 0.0   | 0.0      | 0.9    | 2.9     | 3.4     | 5.3     | 0.0     | 0.0     | 3.1     |
| ECO_TY2482_ | 17084   | 20547   | 3463  | 0.0   | 0.0  | 0.0  | 0.0   | 0.0      | 2.9    | 12.7    | 12.9    | 20.9    | 0.0     | 0.0     | 10.4    |
| ECO_TY2482_ | 27752   | 28688   | 936   | 0.0   | 0.0  | 0.0  | 0.0   | 0.0      | 6.0    | 19.0    | 24.0    | 17.3    | 8.1     | 0.0     | 23.9    |
| ECO_TY2482_ | 53083   | 61507   | 8424  | 28.2  | 0.0* | 0.0* | 76.3  | 0.0*     | 45.2   | 74.6    | 85.4    | 47.8    | 40.6    | 29.9    | 105.3   |
| ECO_TY2482_ | 65178   | 65360   | 182   | 0.0   | 0.0  | 0.0  | 0.0   | 0.0      | 5.7    | 39.2    | 33.0    | 13.9    | 3.7     | 0.0     | 36.1    |
| ECO_TY2482_ | 286624  | 286810  | 186   | 0.0   | 0.0  | 0.0  | 0.0   | 0.0      | 28.8   | 8.4     | 4.4     | 23.8    | 19.3    | 4.1     | 7.3     |
| ECO_TY2482_ | 287043  | 296211  | 9168  | 17.6  | 4.2  | 29.6 | 31.6  | 9.5      | 17.0   | 61.9    | 60.9    | 43.2    | 26.0    | 25.4    | 76.3    |
| ECO_TY2482_ | 620641  | 622915  | 2274  | 0.0   | 0.0  | 0.0  | 0.0   | 0.0      | 4.6    | 17.0    | 21.2    | 6.8     | 0.0     | 0.0     | 19.4    |
| ECO_TY2482_ | 623083  | 654701  | 31618 | 0.0   | 0.0  | 0.0  | 0.0   | 0.0      | 12.6   | 60.8    | 62.1    | 42.2    | 0.0*    | 0.0     | 130.3   |
| ECO_TY2482_ | 659276  | 660180  | 904   | 0.0   | 0.0  | 0.0  | 0.0   | 0.0      | 2.2    | 15.5    | 18.0    | 14.2    | 0.0     | 0.0     | 43.3    |
| ECO_TY2482_ | 661476  | 664083  | 2607  | 0.0   | 0.0  | 0.0  | 0.0   | 0.0      | 3.8    | 22.1    | 25.0    | 15.4    | 0.0     | 0.0     | 21.6    |
| ECO_TY2482_ | 665999  | 666203  | 204   | 0.0   | 0.0  | 0.0  | 0.0   | 0.0      | 6.7    | 19.6    | 16.0    | 7.2     | 0.0     | 0.0     | 11.2    |
| ECO_TY2482_ | 667251  | 673883  | 6632  | 0.0   | 0.0  | 0.0  | 0.0   | 0.0      | 7.2    | 24.7    | 26.1    | 17.0    | 0.0     | 0.0     | 20.9    |
| ECO_TY2482_ | 674381  | 675692  | 1311  | 0.0   | 0.0  | 0.0  | 0.0   | 0.0      | 2.7    | 5.2     | 5.3     | 10.4    | 0.0     | 0.0     | 7.7     |
| ECO_TY2482_ | 676270  | 679111  | 2841  | 11.5  | 11.8 | 0.0  | 0.0   | 11.2     | 19.4   | 30.5    | 31.8    | 23.4    | 7.9     | 10.9    | 32.5    |
| ECO_TY2482_ | 679652  | 680554  | 902   | 0.0   | 0.0  | 0.0  | 0.0   | 0.0      | 3.8    | 11.0    | 14.0    | 13.6    | 0.0     | 0.0     | 20.3    |
| ECO_TY2482_ | 812530  | 814798  | 2268  | 0.0   | 18.7 | 0.0  | 0.0   | 0.0      | 4.8    | 16.8    | 18.9    | 0.0     | 0.0     | 0.0     | 21.3    |
| ECO_TY2482_ | 815833  | 816156  | 323   | 0.0   | 0.0  | 0.0  | 0.0   | 0.0      | 3.7    | 13.8    | 12.7    | 0.0     | 0.0     | 0.0     | 12.9    |
| ECO_TY2482_ | 817534  | 818235  | 701   | 0.0   | 29.8 | 0.0  | 0.0   | 22.6     | 8.0    | 24.3    | 26.4    | 0.0     | 0.0     | 0.0     | 32.8    |
| ECO_TY2482_ | 838266  | 838497  | 231   | 0.0   | 0.0  | 0.0  | 0.0   | 0.0      | 8.8    | 37.5    | 33.2    | 0.0     | 0.0     | 0.0     | 41.9    |
| ECO_TY2482_ | 846777  | 849429  | 2652  | 0.0   | 0.0* | 0.0  | 0.0*  | 0.0      | 17.1   | 26.0    | 74.3    | 0.0     | 0.0     | 0.0     | 59.0    |
| ECO_TY2482_ | 1009501 | 1009697 | 196   | 0.0   | 0.0  | 0.0  | 0.0   | 0.0      | 8.9    | 34.8    | 30.1    | 15.9    | 12.7    | 0.0     | 51.0    |
| ECO_TY2482_ | 1033035 | 1033520 | 485   | 0.0   | 0.0  | 0.0  | 63.6  | 6.8      | 2.2    | 8.5     | 9.3     | 8.5     | 0.0     | 0.0     | 12.8    |
| ECO_TY2482_ | 1041020 | 1042984 | 1964  | 0.0   | 0.0  | 0.0  | 0.0   | 0.0      | 0.0    | 0.0     | 0.0     | 0.0     | 0.0     | 0.0     | 12.6    |
| ECO_TY2482_ | 1043286 | 1044976 | 1690  | 0.0   | 11.9 | 0.0  | 0.0   | 0.0      | 9.6    | 10.8    | 11.1    | 18.7    | 0.0     | 0.0     | 11.0    |
| ECO_TY2482_ | 1048219 | 1048558 | 339   | 0.0   | 0.0  | 0.0  | 0.0   | 0.0      | 4.2    | 27.6    | 16.3    | 13.0    | 0.0     | 0.0     | 20.8    |
| ECO_TY2482_ | 1054379 | 1055342 | 963   | 0.0   | 0.0  | 0.0  | 0.0   | 0.0      | 2.5    | 11.4    | 5.8     | 8.8     | 0.0     | 0.0     | 11.2    |
| ECO_TY2482_ | 1055829 | 1057962 | 2133  | 0.0   | 0.0  | 0.0  | 0.0   | 0.0      | 4.4    | 18.4    | 21.1    | 11.8    | 9.5     | 0.0     | 19.1    |
| ECO_TY2482_ | 1607642 | 1612536 | 4894  | 0.0   | 0.0  | 0.0  | 0.0   | 0.0      | 8.4    | 16.7    | 20.1    | 24.9    | 0.0*    | 0.0     | 15.5    |
| ECO_TY2482_ | 1612868 | 1613597 | 729   | 0.0   | 0.0  | 0.0  | 0.0   | 0.0      | 2.5    | 11.1    | 12.9    | 11.4    | 0.0     | 0.0     | 16.2    |
| ECO_TY2482_ | 1615085 | 1615252 | 167   | 0.0   | 0.0  | 0.0  | 0.0   | 0.0      | 10.4   | 24.9    | 9.3     | 13.2    | 0.0     | 0.0     | 22.3    |
| ECO_TY2482_ | 1623348 | 1623727 | 379   | 0.0   | 0.0  | 0.0  | 0.0   | 0.0      | 8.4    | 37.3    | 26.6    | 28.1    | 0.0     | 0.0     | 37.3    |
| ECO_TY2482_ | 1624852 | 1625137 | 285   | 0.0   | 0.0  | 0.0  | 0.0   | 0.0      | 6.3    | 17.2    | 0.0     | 32.4    | 8.8     | 0.0     | 25.3    |
| ECO_TY2482_ | 3122324 | 3122924 | 600   | 0.4   | 0.0  | 0.0  | 0.0   | 23.8     | 4.3    | 21.2    | 23.6    | 11.2    | 0.0     | 0.0     | 27.8    |
| ECO_TY2482_ | 3126230 | 3132643 | 6413  | 0.0   | 0.0* | 0.0  | 0.0   | 0.0*     | 54.7   | 30.8    | 32.6    | 26.2    | 0.0*    | 0.0*    | 38.4    |
| ECO_TY2482_ | 3890422 | 3890553 | 131   | 0.0   | 0.0  | 0.0  | 0.0   | 0.0      | 1.7    | 14.5    | 9.5     | 10.4    | 0.0     | 0.0     | 11.6    |
| ECO_TY2482_ | 5034313 | 5034466 | 153   | 0.8   | 0.0  | 3.0  | 0.0   | 0.0      | 1.6    | 2.5     | 1.9     | 0.0     | 0.0     | 1.5     | 1.3     |
| ECO_TY2482_ | 5167116 | 5172982 | 5866  | 0.0   | 0.0  | 0.0  | 0.0   | 0.0      | 0.0    | 0.0     | 0.0     | 0.0     | 0.0     | 0.0     | 23.5    |
| ECO_TY2482_ | 5173202 | 5180938 | 7736  | 0.0   | 0.0  | 0.0  | 0.0   | 0.0      | 0.0    | 0.0     | 0.0     | 0.0     | 0.0     | 0.0     | 20.8    |
| ECO_TY2482_ | 5275737 | 5277251 | 1514  | 0.0   | 0.0  | 0.0  | 0.0   | 0.0      | 13.1   | 5.3     | 6.8     | 0.0     | 0.0     | 0.0     | 6.7     |
| ECO_TY2482_ | 17318   | 18088   | 770   | 0.0   | 0.0  | 0.0  | 0.0   | 0.0      | 12.4   | 0.0     | 45.5    | 0.0     | 0.0     | 0.0     | 29.7    |
| ECO_TY2482_ | 27598   | 28672   | 1074  | 0.0   | 0.0  | 0.0  | 16.8  | 0.0      | 18.7   | 7.0     | 3.3     | 10.9    | 23.0    | 14.9    | 18.4    |
| ECO_TY2482_ | 30824   | 32331   | 1507  | 0.0   | 0.0  | 0.0  | 0.0   | 27.9     | 13.6   | 0.0     | 49.9    | 0.0     | 0.0     | 0.0     | 24.1    |
| ECO_TY2482_ | 37400   | 37532   | 132   | 0.0   | 0.0  | 0.0  | 0.0   | 0.0      | 3.3    | 0.0     | 0.0     | 0.0     | 0.0     | 0.0     | 3.9     |
| ECO_TY2482_ | 37730   | 38107   | 377   | 0.0   | 0.0  | 0.0  | 0.0   | 0.0      | 82.0   | 0.5     | 45.8    | 0.0     | 0.0     | 0.0     | 55.3    |
| ECO_TY2482_ | 44056   | 88695   | 44639 | 0.0   | 0.0  | 0.0  | 0.0   | 0.0      | 147.0  | 0.0*    | 141.1   | 0.0     | 0.0     | 0.0     | 71.1    |
| ECO_TY2482_ | 25440   | 30951   | 5511  | 0.0*  | 0.0* | 0.0  | 0.0*  | 37.4     | 19.4   | 0.0*    | 57.5    | 0.0*    | 0.0*    | 0.0*    | 37.9    |
| ECO_TY2482_ | 45503   | 46711   | 1208  | 0.0   | 0.0  | 0.0  | 0.0   | 0.0      | 9.1    | 3.0     | 40.1    | 0.0     | 0.0     | 0.0     | 31.4    |

|             |       |       |      |     |      |     |      |     |      |      |      |     |      |     |      |
|-------------|-------|-------|------|-----|------|-----|------|-----|------|------|------|-----|------|-----|------|
| ECO_TY2482_ | 46954 | 47215 | 261  | 0.0 | 34.1 | 0.0 | 0.0  | 0.0 | 21.4 | 0.0  | 18.6 | 0.0 | 31.7 | 0.0 | 12.7 |
| ECO_TY2482_ | 54025 | 55002 | 977  | 0.0 | 20.1 | 0.0 | 0.0  | 0.0 | 18.4 | 0.0  | 44.6 | 0.0 | 0.0  | 0.0 | 28.3 |
| ECO_TY2482_ | 57890 | 59742 | 1852 | 0.0 | 19.5 | 0.0 | 21.8 | 0.0 | 12.5 | 0.0  | 32.1 | 0.0 | 0.0  | 0.0 | 19.9 |
| ECO_TY2482_ | 60511 | 61335 | 824  | 0.0 | 9.2  | 0.0 | 9.1  | 0.0 | 5.3  | 0.0  | 15.5 | 0.0 | 8.2  | 0.0 | 5.8  |
| ECO_TY2482_ | 70380 | 70609 | 229  | 0.0 | 0.0  | 0.0 | 0.0  | 0.0 | 8.2  | 0.0  | 14.3 | 0.0 | 0.0  | 0.0 | 8.4  |
| ECO_TY2482_ | 71067 | 71626 | 559  | 0.0 | 0.0  | 0.0 | 0.0  | 0.0 | 9.3  | 0.0  | 31.0 | 0.0 | 0.0  | 0.0 | 18.0 |
| ECO_TY2482_ | 0     | 1549  | 1549 | 0.0 | 0.6  | 0.0 | 0.0  | 0.0 | 3.2  | 36.3 | 8.6  | 0.0 | 0.0  | 0.0 | 25.9 |

\* indicates evidence for truncated or internally rearranged sequence

**Supplementary Table 7.** Putative virulence factors present in C227-11. A condensed version of Supplementary Table 5 highlighting the virulence factors identified in C227-11. Nucleotide sequences corresponding to these factors are provided in the 'Accession' column (GenBank accession numbers).

| Gene                    | Location    | Putative virulence function                                                                                                                                                                                                   | Described                             | Accession                 |
|-------------------------|-------------|-------------------------------------------------------------------------------------------------------------------------------------------------------------------------------------------------------------------------------|---------------------------------------|---------------------------|
| <b>Master regulator</b> |             |                                                                                                                                                                                                                               |                                       |                           |
| <i>aggR</i>             | pAA plasmid | Master regulator of a package of EAEC plasmid virulence genes, including aggregative adherence factors, fimbriae AAF/I-AAF/IV, and a large cluster of genes inserted on a pathogenicity island at the PheU locus <sup>1</sup> | EAEC-042                              | Z18751                    |
| <b>AggR regulated</b>   |             |                                                                                                                                                                                                                               |                                       |                           |
| <i>aatPABCD</i>         | pAA plasmid | Encodes ABC protein responsible for transporting the dispersin protein out of the outer membrane of EAEC <sup>2</sup>                                                                                                         | EAEC-042                              | AY351860                  |
| <i>aap</i>              | pAA plasmid | Encodes a 10 kDa secreted protein named dispersin, and is responsible for 'dispersing' EAEC across the intestinal mucosa                                                                                                      | EAEC-042                              | Z32523                    |
| <i>aggABCD</i>          | pAA plasmid | Encodes AAF/I mediates adherence to colonic mucosa and hemagglutination of erythrocytes <sup>4</sup>                                                                                                                          | EAEC-JM221                            | AY344586                  |
| <i>aaiA-P</i>           | Chromosome  | Encodes a type VI secretion system encoded on the <i>pheU</i> island on the chromosome. Mode of action unknown <sup>5</sup>                                                                                                   | EAEC-042                              | -                         |
| <b>Toxin gene</b>       |             |                                                                                                                                                                                                                               |                                       |                           |
| <i>stx2a</i>            | Chromosome  | Shiga toxin (Stx); A-B-type toxin that inhibits protein synthesis in eukaryotic cells, is thought to be required for the manifestations of EHEC infection, such as hemorrhagic colitis                                        | <i>E. coli</i> O157:H7 EDL933         | X07865                    |
| <i>sigA</i>             | Chromosome  | Encodes an IgA protease-like homologue <sup>8</sup>                                                                                                                                                                           | <i>S. flexneri</i> 2a 2457T           | <a href="#">NC_004337</a> |
| <i>pic</i>              | Chromosome  | Encodes the Pic protein; mucinase activity and is capable of causing hemagglutination of erythrocytes <sup>9</sup>                                                                                                            | <i>S. flexneri</i> 2a & EAEC-042      | <a href="#">AF097644</a>  |
| <i>sepA</i>             | pAA plasmid | Encodes <i>Shigella</i> extracellular protein. May induce mucosal atrophy and tissue inflammation in <i>S. flexneri</i> <sup>10</sup>                                                                                         | <i>S. flexneri</i> 2a & EAEC-C1010-00 | <a href="#">Z48219</a>    |
| <b>Other genes</b>      |             |                                                                                                                                                                                                                               |                                       |                           |
| <i>air</i>              | Chromosome  | Possible aggregation and adherence <sup>11</sup>                                                                                                                                                                              | EAEC-042                              | -                         |
| <i>capU</i>             | pAA plasmid | Hexosyltransferase homologue <sup>6</sup>                                                                                                                                                                                     | EAEC-042                              | AF134403                  |
| ETT2 genes              | Chromosome  | Putative Type III secretion system                                                                                                                                                                                            | EAEC-042                              | -                         |

1. Bernier C, Gounon P, Le Bouguenec C. Identification of an aggregative adhesion fimbria (AAF) type III-encoding operon in enteroaggregative *Escherichia coli* as a sensitive probe for detecting the AAF-encoding operon family. *Infect Immun* 2002;70:4302-11.
2. Nishi J, Sheikh J, Mizuguchi K, et al. The export of coat protein from enteroaggregative *Escherichia coli* by a specific ATP-binding cassette transporter system. *J Biol Chem* 2003;278:45680-9.
3. Sheikh J, Czczulin JR, Harrington S, et al. A novel dispersin protein in enteroaggregative *Escherichia coli*. *J Clin Invest* 2002;110:1329-37.

4. Nataro JP, Deng Y, Maneval DR, German AL, Martin WC, Levine MM. Aggregative adherence fimbriae I of enteroaggregative *Escherichia coli* mediate adherence to HEP-2 cells and hemagglutination of human erythrocytes. *Infect Immun* 1992;60:2297-304.
5. Dudley EG, Thomson NR, Parkhill J, Morin NP, Nataro JP. Proteomic and microarray characterization of the AggR regulon identifies a pheU pathogenicity island in enteroaggregative *Escherichia coli*. *Mol Microbiol* 2006;61:1267-82.
6. Czczulin JR, Whittam TS, Henderson IR, Navarro-Garcia F, Nataro JP. Phylogenetic analysis of enteroaggregative and diffusely adherent *Escherichia coli*. *Infect Immun* 1999;67:2692-9.
7. Karmali MA. Infection by verocytotoxin-producing *Escherichia coli*. *Clin Microbiol Rev* 1989;2:15-38.
8. Rajakumar K, Sasakawa C, Adler B. Use of a novel approach, termed island probing, identifies the *Shigella flexneri* she pathogenicity island which encodes a homolog of the immunoglobulin A protease-like family of proteins. *Infect Immun* 1997;65:4606-14.
9. Henderson IR, Czczulin J, Eslava C, Noriega F, Nataro JP. Characterization of pic, a secreted protease of *Shigella flexneri* and enteroaggregative *Escherichia coli*. *Infect Immun* 1999;67:5587-96.
10. Benjelloun-Touimi Z, Si Tahar M, Montecucco C, Sansonetti PJ, Parsot C. SepA, the 110 kDa protein secreted by *Shigella flexneri*: two-domain structure and proteolytic activity. *Microbiology* 1998;144 ( Pt 7):1815-22.
11. Sheikh J, Dudley EG, Sui B, Tamboura B, Suleman A, Nataro JP. EilA, a HilA-like regulator in enteroaggregative *Escherichia coli*. *Mol Microbiol* 2006;61:338-50.



**Supplementary Table 8.** EAEC-specific virulence factors mapped to the O104 and other EAEC reference isolates sequenced in our study. Similar to Supplementary Table 5 but focused on EAEC-specific virulence factors present in the AA plasmid from the O42 strain.

| UNIQUID                                                                                        | 55989.0 | 17-2  | O42   | JM221 | C1010-00 | C35-10 | C682-09 | C734-09 | C754-09 | C760-09 | C777-10 | C227-11 |
|------------------------------------------------------------------------------------------------|---------|-------|-------|-------|----------|--------|---------|---------|---------|---------|---------|---------|
| EC042_pAA001 noGene -- transposase (pseudogene)                                                | 1.6     | 183.4 | 61.3  | 1.9   | 41.4     | 60.3   | 0.0     | 3.7     | 0.0     | 36.6    | 1.4     | 1.7     |
| EC042_pAA005 noGene -- hypothetical protein                                                    | 0.0     | 0.0   | 0.0   | 0.0   | 0.0      | 0.0    | 0.0     | 0.0     | 0.0     | 0.0     | 0.0     | 0.0     |
| EC042_pAA005A noGene -- conserved hypothetical protein                                         | 0.0     | 1.0   | 0.0   | 1.0   | 2.4      | 3.1    | 0.0     | 6.8     | 0.0     | 0.6     | 0.0     | 4.5     |
| EC042_pAA005A noGene -- transposase (pseudogene)                                               | 4.0     | 1.4   | 1.0   | 2.1   | 8.7      | 2.1    | 1.7     | 2.7     | 5.7     | 3.5     | 5.2     | 2.8     |
| EC042_pAA007 aatP -- permease                                                                  | 7.9     | 7.1   | 2.5   | 2.6   | 2.5      | 3.7    | 0.0     | 5.4     | 6.6     | 4.4     | 6.7     | 4.1     |
| EC042_pAA011 noGene -- transposase (pseudogene)                                                | 16.7    | 31.6  | 24.7  | 9.2   | 26.7     | 48.9   | 24.6    | 42.9    | 4.8     | 31.3    | 18.2    | 46.4    |
| EC042_pAA013 noGene -- transposase                                                             | 1.1     | 18.1  | 5.6   | 0.0   | 4.0      | 6.7    | 6.1     | 14.2    | 0.9     | 5.0     | 1.0     | 11.9    |
| EC042_pAA014 noGene -- transposase                                                             | 15.3    | 31.9  | 30.5  | 0.0   | 16.4     | 23.0   | 14.0    | 38.4    | 0.0     | 12.0    | 9.4     | 30.4    |
| EC042_pAA015 noGene -- hypothetical protein                                                    | 0.0     | 0.0   | 3.7   | 0.0   | 0.0      | 0.0    | 0.0     | 0.0     | 0.0     | 0.0     | 0.0     | 0.0     |
| EC042_pAA016 noGene -- site-specific recombinase                                               | 19.8    | 12.4  | 19.9  | 17.6  | 26.3     | 48.3   | 0.0     | 25.0    | 36.1    | 33.3    | 25.8    | 19.7    |
| EC042_pAA017 ccdB -- post-segregation toxin (cytotoxic protein)                                | 11.1    | 10.8  | 1.6   | 8.6   | 12.8     | 22.5   | 0.0     | 15.8    | 10.7    | 16.2    | 7.5     | 10.1    |
| EC042_pAA018 ccdA -- toxin addiction system antidote protein                                   | 2.8     | 4.2   | 2.5   | 0.8   | 6.6      | 18.8   | 0.0     | 0.8     | 6.9     | 3.8     | 0.0     | 3.0     |
| EC042_pAA018 noGene -- conserved hypothetical protein (pseudogene)                             | 0.0     | 0.0   | 4.1   | 0.0   | 0.0      | 8.3    | 0.0     | 0.0     | 0.0     | 0.0     | 0.0     | 0.0     |
| EC042_pAA020 noGene -- conserved hypothetical protein                                          | 0.0     | 0.0   | 9.7   | 0.0   | 0.0      | 58.8   | 0.0     | 0.0     | 0.0     | 0.0     | 0.0     | 0.0     |
| EC042_pAA022 noGene -- glycosyl transferase                                                    | 10.5    | 13.3  | 22.8  | 0.0   | 0.0      | 10.8   | 7.9     | 14.6    | 13.5    | 15.1    | 12.0    | 8.2     |
| EC042_pAA023 noGene -- conserved hypothetical protein (pseudogene)                             | 113.2   | 22.7  | 57.6  | 41.5  | 81.3     | 25.7   | 48.3    | 85.6    | 144.4   | 130.6   | 112.1   | 91.7    |
| EC042_pAA023 noGene -- transposase (pseudogene)                                                | 19.2    | 2.4   | 11.8  | 1.6   | 15.9     | 6.6    | 8.4     | 13.6    | 27.8    | 22.7    | 17.7    | 13.5    |
| EC042_pAA023 virK -- virulence protein required for expression/correct membrane localisation o | 8.3     | 9.8   | 18.3  | 0.0   | 0.0      | 11.5   | 5.4     | 5.1     | 8.9     | 8.8     | 7.9     | 5.9     |
| EC042_pAA026 noGene -- transposase                                                             | 0.0     | 0.0   | 12.4  | 0.0   | 0.0      | 20.3   | 0.0     | 0.0     | 0.0     | 27.2    | 0.0     | 0.0     |
| EC042_pAA027 noGene -- transposase                                                             | 0.0     | 0.8   | 0.6   | 0.0   | 1.0      | 1.0    | 1.0     | 0.8     | 0.0     | 0.2     | 0.0     | 0.4     |
| EC042_pAA028 noGene -- transposase                                                             | 0.0     | 2.1   | 0.0   | 0.0   | 0.4      | 0.0    | 0.0     | 0.0     | 0.0     | 0.0     | 0.0     | 0.3     |
| EC042_pAA028 noGene -- transposase (pseudogene)                                                | 0.0     | 0.0   | 5.4   | 0.0   | 0.0      | 0.0    | 0.0     | 0.0     | 0.0     | 9.9     | 0.0     | 0.0     |
| EC042_pAA030 aafB -- afimbrial adhesin                                                         | 0.0     | 0.0   | 2.2   | 0.0   | 0.0      | 0.0    | 0.0     | 0.0     | 0.0     | 0.0     | 0.0     | 0.0     |
| EC042_pAA031 aafC -- aggregative adherence fimbria II usher protein                            | 2.0     | 0.0*  | 20.6  | 2.0   | 1.8      | 17.9   | 0.0     | 1.9     | 1.0     | 1.6     | 1.5     | 1.4     |
| EC042_pAA031 afaB -- fimbrial chaperone protein (pseudogene)                                   | 0.0     | 0.0   | 4.8   | 0.6   | 0.0      | 0.0    | 0.0     | 0.0     | 0.0     | 0.0     | 0.0     | 0.0     |
| EC042_pAA033 noGene -- transposase                                                             | 127.8   | 28.7  | 75.3  | 107.6 | 44.1     | 192.2  | 104.2   | 93.4    | 82.2    | 89.8    | 83.8    | 72.3    |
| EC042_pAA034 noGene -- transposase                                                             | 479.2   | 141.2 | 342.0 | 631.4 | 188.1    | 785.2  | 364.5   | 410.8   | 357.4   | 325.5   | 322.3   | 383.6   |
| EC042_pAA035 noGene -- transposase (pseudogene)                                                | 1.0     | 159.9 | 62.2  | 17.0  | 52.8     | 44.5   | 21.2    | 0.0*    | 1.0     | 6.2     | 0.0*    | 15.9    |
| EC042_pAA035 pet -- serine protease (plasmid-encoded toxin Pet)                                | 0.0*    | 0.0*  | 19.2  | 0.0*  | 0.0*     | 0.0    | 0.0*    | 0.0*    | 0.0     | 0.0*    | 0.0*    | 0.0*    |
| EC042_pAA039 noGene -- transposase                                                             | 0.0     | 0.0   | 2.5   | 0.0   | 0.8      | 0.0    | 0.0     | 0.0     | 0.0     | 0.0     | 0.0     | 0.0     |
| EC042_pAA041 noGene -- conserved hypothetical protein                                          | 0.0     | 8.6   | 1.1   | 10.7  | 0.0      | 6.0    | 0.0     | 17.8    | 0.0     | 0.0     | 0.0     | 8.5     |
| EC042_pAA042 noGene -- conserved hypothetical protein                                          | 0.0     | 26.0  | 6.1   | 23.5  | 0.0      | 12.9   | 0.0     | 42.0    | 0.0     | 0.0     | 0.0     | 28.1    |
| EC042_pAA042 noGene -- transposase (pseudogene)                                                | 0.0     | 0.0   | 0.6   | 0.0   | 0.0      | 0.0    | 0.0     | 0.0     | 0.0     | 0.0     | 0.0     | 0.0     |
| EC042_pAA046 aafD -- chaperone protein                                                         | 1.5     | 0.5   | 8.9   | 0.9   | 0.0      | 0.0    | 0.0     | 0.0     | 0.6     | 0.0     | 0.7     | 0.2     |
| EC042_pAA047 noGene -- hypothetical protein                                                    | 0.0     | 0.0   | 0.0   | 0.0   | 0.0      | 0.0    | 0.0     | 0.0     | 0.0     | 0.0     | 0.0     | 0.0     |
| EC042_pAA048 aafA -- major fimbrial subunit of aggregative adherence fimbria II                | 0.0     | 0.0   | 2.6   | 0.0   | 0.0      | 0.0    | 0.0     | 0.0     | 0.0     | 0.0     | 0.0     | 0.0     |
| EC042_pAA048 noGene -- transposase (pseudogene)                                                | 0.0     | 0.0   | 0.0   | 0.0   | 0.0      | 0.0    | 0.0     | 0.0     | 0.0     | 0.0     | 0.0     | 0.0     |
| EC042_pAA051 noGene -- transposase                                                             | 7.4     | 11.3  | 23.8  | 30.1  | 5.9      | 32.3   | 16.8    | 18.1    | 13.4    | 14.5    | 5.7     | 10.7    |
| EC042_pAA052 aggR -- transcriptional activator                                                 | 27.5    | 20.9  | 6.3   | 19.5  | 10.3     | 10.9   | 0.0     | 32.8    | 31.4    | 16.6    | 18.7    | 23.3    |
| EC042_pAA052 noGene -- transposase (pseudogene)                                                | 1.2     | 2.9   | 1.6   | 0.7   | 0.0      | 0.6    | 0.0     | 1.4     | 1.0     | 0.8     | 2.2     | 0.6     |
| EC042_pAA056 noGene -- hypothetical protein                                                    | 3.0     | 0.9   | 0.0   | 0.9   | 0.0      | 4.2    | 0.0     | 6.2     | 0.0     | 1.6     | 0.0     | 4.9     |
| EC042_pAA056 noGene -- transposase (pseudogene)                                                | 0.0     | 0.0   | 7.3   | 0.0   | 3.0      | 2.1    | 0.0     | 0.0     | 0.0     | 0.0     | 0.0     | 0.0     |
| EC042_pAA059 noGene -- transposase                                                             | 0.0     | 12.1  | 6.4   | 0.0   | 0.0      | 0.0    | 0.0     | 0.0     | 0.0     | 0.0     | 0.0     | 0.0     |
| EC042_pAA060 noGene -- conserved hypothetical protein                                          | 7.1     | 8.8   | 0.7   | 6.1   | 0.0      | 15.4   | 0.0     | 23.6    | 7.2     | 4.0     | 4.0     | 17.4    |
| EC042_pAA061 noGene -- conserved hypothetical protein                                          | 20.8    | 34.6  | 14.2  | 46.1  | 20.7     | 13.3   | 9.5     | 45.1    | 29.2    | 19.6    | 19.8    | 48.1    |
| EC042_pAA062 noGene -- transposase                                                             | 0.3     | 17.1  | 20.6  | 72.2  | 14.7     | 10.9   | 0.0     | 47.9    | 0.4     | 7.2     | 0.0     | 37.6    |
| EC042_pAA063 noGene -- transposase                                                             | 0.0     | 1.3   | 1.0   | 5.4   | 1.2      | 1.0    | 0.0     | 3.2     | 0.0     | 1.5     | 0.0     | 2.1     |
| EC042_pAA064 noGene -- transposase                                                             | 0.0     | 8.7   | 16.6  | 45.6  | 12.4     | 10.7   | 0.0     | 29.1    | 0.0     | 6.6     | 0.0     | 29.8    |
| EC042_pAA064 noGene -- transposase (pseudogene)                                                | 0.0     | 0.0   | 0.8   | 0.0   | 0.0      | 0.0    | 0.0     | 0.0     | 0.0     | 0.0     | 0.0     | 0.0     |
| EC042_pAA066 finO -- fertility inhibition protein (conjugal transfer repressor)                | 28.4    | 12.2  | 6.8   | 16.4  | 12.0     | 70.4   | 0.0     | 13.7    | 36.0    | 28.5    | 48.5    | 11.9    |
| EC042_pAA067 traX -- conjugative transfer protein                                              | 0.0     | 0.0   | 11.7  | 0.0   | 15.9     | 35.8   | 0.0     | 19.8    | 0.0     | 21.8    | 16.5    | 19.9    |
| EC042_pAA068 traI -- DNA helicase I                                                            | 0.0     | 0.0   | 36.7  | 0.0   | 40.3     | 126.5  | 0.0*    | 55.5    | 0.0     | 50.6    | 37.3    | 42.6    |
| EC042_pAA069 traD -- conjugative transfer protein                                              | 0.0     | 0.0   | 23.5  | 0.0   | 22.4     | 68.6   | 0.0     | 0.0     | 0.0     | 27.2    | 26.4    | 0.0     |
| EC042_pAA070 noGene -- putative conjugative transfer protein                                   | 0.0     | 0.0   | 6.2   | 0.0   | 7.2      | 25.4   | 0.0     | 0.0     | 0.0     | 5.0     | 5.5     | 0.0     |
| EC042_pAA071 traT -- enterobacterial complement resistance protein                             | 0.0     | 0.0   | 11.1  | 0.0   | 11.8     | 77.7   | 0.0     | 0.0     | 0.0     | 13.5    | 7.4     | 0.0     |
| EC042_pAA072 traS -- conjugative transfer protein                                              | 0.0     | 0.0   | 3.0   | 0.0   | 0.0      | 4.3    | 0.0     | 0.0     | 0.0     | 0.0     | 0.0     | 0.0     |
| EC042_pAA073 traG -- conjugative transfer protein                                              | 0.0     | 0.0   | 27.4  | 0.0   | 31.7     | 84.5   | 0.0     | 0.0     | 0.0     | 36.4    | 29.0    | 0.0     |
| EC042_pAA074 traH -- conjugative transfer protein                                              | 0.0     | 0.0   | 11.7  | 0.0   | 18.0     | 53.8   | 0.0     | 0.0     | 0.0     | 19.7    | 21.3    | 0.0     |
| EC042_pAA075 trbF -- conjugative transfer protein                                              | 0.0     | 0.0   | 2.9   | 0.0   | 0.0      | 1.9    | 0.0     | 0.0     | 0.0     | 1.1     | 4.8     | 0.0     |
| EC042_pAA076 trbJ -- conjugative transfer protein                                              | 0.0     | 0.0   | 0.6   | 0.0   | 2.6      | 5.1    | 0.0     | 0.0     | 0.0     | 0.4     | 0.0     | 0.0     |
| EC042_pAA077 trbB -- conjugative transfer protein                                              | 0.0     | 0.0   | 13.3  | 0.0   | 19.5     | 48.8   | 0.0     | 0.0     | 0.0     | 12.5    | 11.3    | 0.0     |
| EC042_pAA078 traQ -- conjugative transfer protein                                              | 0.0     | 0.0   | 3.3   | 0.0   | 2.7      | 15.3   | 0.0     | 0.0     | 0.0     | 3.4     | 2.2     | 0.0     |
| EC042_pAA079 trbA -- conjugative transfer protein                                              | 0.0     | 0.0   | 3.6   | 0.0   | 5.3      | 4.7    | 0.0     | 0.0     | 0.0     | 6.9     | 10.2    | 0.0     |



|                                                        |     |     |     |     |     |     |     |     |     |     |     |     |     |
|--------------------------------------------------------|-----|-----|-----|-----|-----|-----|-----|-----|-----|-----|-----|-----|-----|
| EC042_pAA153 repA2 -- replication regulatory protein 1 | 0.0 | 0.0 | 4.7 | 0.0 | 0.0 | 0.0 | 0.0 | 0.0 | 0.0 | 0.0 | 0.0 | 0.0 | 0.0 |
| EC042_pAA155 noGene -- transposase (pseudogene)        | 0.0 | 0.0 | 0.0 | 0.0 | 0.0 | 0.0 | 0.0 | 0.0 | 0.0 | 0.0 | 0.0 | 0.0 | 0.0 |
| EC042_pAA157 noGene -- transposase                     | 0.0 | 3.8 | 1.6 | 0.4 | 0.0 | 0.3 | 0.0 | 0.0 | 0.0 | 0.0 | 0.0 | 0.0 | 0.2 |
| EC042_pAA158 noGene -- transposase                     | 4.5 | 0.7 | 0.5 | 0.0 | 1.7 | 2.7 | 2.3 | 0.7 | 1.9 | 1.2 | 4.2 | 1.2 | 1.2 |
| EC042_pAA158 noGene -- transposase (pseudogene)        | 0.0 | 0.0 | 3.9 | 0.0 | 0.0 | 0.0 | 0.0 | 0.0 | 0.0 | 0.0 | 0.0 | 0.0 | 0.0 |

\* indicates evidence for truncated or internally rearranged sequence
